# Supplementary material for: ANRIL/CDKN2B-AS shows two-stage clade-specific evolution and becomes conserved after transposon insertions in simians
Source: PubMed Central journal article supplement (PMC3831594; doi:10.1186/1471-2148-13-247), 2013-11-13
Supplement: 1471-2148-13-247-S1.pdf [file 1471-2148-13-247-S1.pdf]

Supplementary file 1 - Blat/Infernal search results. Large numbers in "chr#" and "strand" are scaffold/contig numbers and CHRO numbers, respectively. Empty indicates no result. Only the highest- and second highest-scoring hits are displayed

| species  | exon    | span  | chr         | Blat search results |       |          | Infernal search results |       |        |       |         |
|----------|---------|-------|-------------|---------------------|-------|----------|-------------------------|-------|--------|-------|---------|
|          |         |       |             | strand              | score | identity | span                    | chr # | strand | score | E-value |
| Platypus | E1=371  | 75580 | 4           | -                   | 36    | 97.4     |                         |       |        |       |         |
|          |         | 47    | Cotig5544   | +                   | 29    | 94       |                         |       |        |       |         |
|          | E2=162  | 20    | X5          | +                   | 20    | 100      |                         |       |        |       |         |
|          |         | 20    | Cotig80000  | +                   | 20    | 100      |                         |       |        |       |         |
|          | E3=328  |       |             |                     |       |          |                         |       |        |       |         |
|          | E4=135  | 25    | Ultra143    | +                   | 23    | 100      |                         |       |        |       |         |
|          |         | 22    | Ultra524    | -                   | 22    | 100      |                         |       |        |       |         |
|          | E5=150  | 37    | 7           | +                   | 26    | 100      |                         |       |        |       |         |
|          |         | 371   | Cotig15811  | -                   | 24    | 100      |                         |       |        |       |         |
|          | E6=123  | 25    | Cotig7463   | -                   | 25    | 100      |                         |       |        |       |         |
|          | E7=136  | 110   | Cotig105522 | -                   | 79    | 87.1     |                         |       |        |       |         |
|          |         | 95    | Cotig162904 | -                   | 67    | 85.3     |                         |       |        |       |         |
|          | E8=700  | 317   | Cotig204310 | +                   | 212   | 88.9     |                         |       |        |       |         |
|          |         | 34    | 11          | +                   | 28    | 81.3     |                         |       |        |       |         |
|          | E9=74   | 20    | 7           | +                   | 20    | 100      |                         |       |        |       |         |
|          | E10=75  |       |             |                     |       |          |                         |       |        |       |         |
|          | E11=96  |       |             |                     |       |          |                         |       |        |       |         |
|          | E12=119 | 98    | 7           | +                   | 32    | 97.2     |                         |       |        |       |         |
|          | E13=143 | 20    | Ultra483    | -                   | 20    | 100      |                         |       |        |       |         |
|          |         | 20    | Ultra103    | -                   | 20    | 100      |                         |       |        |       |         |
|          | E14=113 | 491   | Ultra225    | -                   | 27    | 96.6     |                         |       |        |       |         |
|          |         | 27    | Ultra56     | -                   | 24    | 100      |                         |       |        |       |         |
|          | E15=76  | 21    | 1           | +                   | 21    | 100      |                         |       |        |       |         |
|          | E16=134 | 20    | Cotig2774   | -                   | 20    | 100      |                         |       |        |       |         |
|          | E17=126 | 43    | 1           | +                   | 28    | 96.8     |                         |       |        |       |         |
|          |         | 40    | 10          | -                   | 27    | 96.6     |                         |       |        |       |         |

|                |         |        |           |   |    |      |  |  |  |  |  |
|----------------|---------|--------|-----------|---|----|------|--|--|--|--|--|
|                | E18=211 | 207    | 3         | + | 25 | 100  |  |  |  |  |  |
|                |         | 32     | Cotig8167 | - | 24 | 87.5 |  |  |  |  |  |
|                | E19=596 | 130    | 6         | + | 65 | 97.2 |  |  |  |  |  |
|                |         | 252    | Ultra9    | - | 62 | 97.2 |  |  |  |  |  |
| <b>Opossum</b> | E1=371  | 27     | 3         | - | 25 | 96.3 |  |  |  |  |  |
|                |         | 28     | 2         | + | 24 | 80.8 |  |  |  |  |  |
|                | E2=162  | 267    | 6         | - | 27 | 100  |  |  |  |  |  |
|                |         | 26     | 6         | - | 24 | 100  |  |  |  |  |  |
|                | E3=328  | 39     | 2         | - | 25 | 96.3 |  |  |  |  |  |
|                |         | 22     | U         | - | 22 | 100  |  |  |  |  |  |
|                | E4=135  | 37     | 4         | - | 27 | 87.1 |  |  |  |  |  |
|                |         | 33     | 2         | - | 27 | 76.7 |  |  |  |  |  |
|                | E5=150  | 41     | 1         | - | 26 | 100  |  |  |  |  |  |
|                |         | 44     | 3         | - | 25 | 100  |  |  |  |  |  |
|                | E6=123  | 21     | 1         | - | 21 | 100  |  |  |  |  |  |
|                |         | 20     | 5         | + | 20 | 100  |  |  |  |  |  |
|                | E7=136  | 46     | 5         | - | 28 | 80.5 |  |  |  |  |  |
|                |         | 35     | 3         | + | 28 | 77.2 |  |  |  |  |  |
|                | E8=700  | 28     | 1         | - | 22 | 95.9 |  |  |  |  |  |
|                |         | 24     | 1         | + | 22 | 95.9 |  |  |  |  |  |
|                | E9=74   | 31     | 6         | - | 23 | 100  |  |  |  |  |  |
|                |         | 21     | 8         | + | 21 | 100  |  |  |  |  |  |
|                | E10=75  | 34     | 7         | - | 24 | 96.2 |  |  |  |  |  |
|                |         |        |           |   |    |      |  |  |  |  |  |
|                | E11=96  | 24     | 4         | + | 20 | 91.7 |  |  |  |  |  |
|                |         |        |           |   |    |      |  |  |  |  |  |
|                | E12=119 |        |           |   |    |      |  |  |  |  |  |
|                |         |        |           |   |    |      |  |  |  |  |  |
|                | E13=143 | 26     | 2         | + | 22 | 100  |  |  |  |  |  |
|                |         | 22     | 4         | - | 20 | 95.5 |  |  |  |  |  |
|                | E14=113 | 20     | 4         | - | 20 | 100  |  |  |  |  |  |
|                |         | 22     | 3         | - | 20 | 95.5 |  |  |  |  |  |
|                | E15=76  |        |           |   |    |      |  |  |  |  |  |
|                |         |        |           |   |    |      |  |  |  |  |  |
|                | E16=134 | 26     | 6         | - | 23 | 84.7 |  |  |  |  |  |
|                |         | 20     | 7         | + | 20 | 100  |  |  |  |  |  |
|                | E17=126 | 20     | 4         | + | 20 | 100  |  |  |  |  |  |
|                |         |        |           |   |    |      |  |  |  |  |  |
|                | E18=211 | 224784 | 3         | + | 36 | 100  |  |  |  |  |  |
|                |         | 28     | 8         | + | 24 | 92.9 |  |  |  |  |  |

|                |         |     |               |   |    |      |  |  |  |  |
|----------------|---------|-----|---------------|---|----|------|--|--|--|--|
|                | E19=596 | 261 | 2             | + | 68 | 97.4 |  |  |  |  |
|                |         | 72  | 2             | + | 59 | 87   |  |  |  |  |
| <b>Wallaby</b> | E1=371  | 31  | GL103889      | + | 27 | 96.7 |  |  |  |  |
|                |         | 25  | GL104774      | + | 24 | 80   |  |  |  |  |
|                | E2=162  | 20  | GL111150      | - | 20 | 100  |  |  |  |  |
|                |         |     |               |   |    |      |  |  |  |  |
|                | E3=328  | 29  | GL098381      | - | 28 | 86.3 |  |  |  |  |
|                |         | 26  | GL080124      | + | 24 | 96.2 |  |  |  |  |
|                | E4=135  | 31  | GL048611      | + | 28 | 74.2 |  |  |  |  |
|                |         | 33  | GL102068      | - | 27 | 96.7 |  |  |  |  |
|                | E5=150  | 121 | GL068143      | - | 29 | 100  |  |  |  |  |
|                |         | 39  | GL084111      | - | 25 | 96.3 |  |  |  |  |
|                | E6=123  |     |               |   |    |      |  |  |  |  |
|                |         |     |               |   |    |      |  |  |  |  |
|                | E7=136  | 31  | GL062437      | - | 25 | 90.4 |  |  |  |  |
|                |         | 24  | GL129393      | + | 23 | 79.2 |  |  |  |  |
|                | E8=700  | 28  | GL065110      | + | 27 | 67.9 |  |  |  |  |
|                |         | 29  | GL069634      | + | 24 | 100  |  |  |  |  |
|                | E9=74   | 23  | GL092770      | + | 21 | 100  |  |  |  |  |
|                |         | 20  | GL134166      | + | 20 | 100  |  |  |  |  |
|                | E10=75  |     |               |   |    |      |  |  |  |  |
|                |         |     |               |   |    |      |  |  |  |  |
|                | E11=96  | 45  | GL098888      | - | 30 | 94   |  |  |  |  |
|                |         |     |               |   |    |      |  |  |  |  |
|                | E12=119 | 34  | GL097307      | + | 26 | 88.3 |  |  |  |  |
|                |         | 29  | GL110911      | - | 21 | 86.3 |  |  |  |  |
|                | E13=143 | 20  | GL087131      | + | 20 | 100  |  |  |  |  |
|                |         |     |               |   |    |      |  |  |  |  |
|                | E14=113 | 33  | GL105079      | - | 23 | 96.2 |  |  |  |  |
|                |         | 24  | GL114816      | + | 23 | 87.5 |  |  |  |  |
|                | E15=76  | 20  | GL069973      | - | 20 | 100  |  |  |  |  |
|                |         |     |               |   |    |      |  |  |  |  |
|                | E16=134 | 22  | GL095742      | + | 22 | 100  |  |  |  |  |
|                |         | 20  | GL056132      | + | 20 | 100  |  |  |  |  |
|                | E17=126 | 57  | GL156609      | - | 31 | 97.2 |  |  |  |  |
|                |         | 32  | ABQO011173872 | - | 27 | 96.6 |  |  |  |  |
|                | E18=211 | 32  | GL062535      | - | 24 | 100  |  |  |  |  |
|                |         | 41  | GL105147      | - | 23 | 96.2 |  |  |  |  |
|                | E19=596 | 70  | GL105239      | - | 62 | 82.9 |  |  |  |  |
|                |         | 63  | GL102360      | - | 57 | 82.6 |  |  |  |  |

|                  |         |     |          |   |     |      |       |                 |   |       |          |
|------------------|---------|-----|----------|---|-----|------|-------|-----------------|---|-------|----------|
| <b>Sloth</b>     | E1=371  | 34  | 106431   | + | 25  | 96.3 |       |                 |   |       |          |
|                  |         | 26  | 28297    | + | 23  | 80   |       |                 |   |       |          |
|                  | E2=162  | 20  | 96569    | + | 20  | 100  |       |                 |   |       |          |
|                  |         | 20  | 91030    | + | 20  | 100  |       |                 |   |       |          |
|                  | E3=328  | 33  | 41458    | - | 27  | 96.7 |       |                 |   |       |          |
|                  |         | 31  | 1356     | + | 27  | 96.7 |       |                 |   |       |          |
|                  | E4=135  | 35  | 26800    | + | 27  | 89.7 | 1-135 | scaffold_21706  | + | 66.67 | 7.26E-11 |
|                  |         | 42  | 57669    | - | 25  | 93.2 | 1-135 | scaffold_26209  | - | 35.35 | 0.00161  |
|                  | E5=150  | 66  | 30677    | - | 36  | 92.7 | 1-150 | scaffold_21706  | + | 95.31 | 1.59E-16 |
|                  |         | 21  | 64332    | - | 21  | 100  | 1-150 | scaffold_110619 | - | 28.51 | 0.1369   |
|                  | E6=123  | 39  | 21706    | + | 35  | 84.7 | 1-123 | scaffold_21706  | + | 58.61 | 1.12E-11 |
|                  |         |     |          |   |     |      | 1-123 | scaffold_66627  | - | 28.39 | 0.002994 |
|                  | E7=136  | 20  | 14210    | - | 20  | 100  |       |                 |   |       |          |
|                  |         |     |          |   |     |      |       |                 |   |       |          |
|                  | E8=700  | 46  | 192702   | - | 40  | 93.5 |       |                 |   |       |          |
|                  |         | 99  | 88065    | + | 40  | 93.5 |       |                 |   |       |          |
|                  | E9=74   | 33  | 20333    | + | 24  | 96.2 |       |                 |   |       |          |
|                  |         | 23  | 39741    | + | 21  | 95.7 |       |                 |   |       |          |
|                  | E10=75  |     |          |   |     |      |       |                 |   |       |          |
|                  |         |     |          |   |     |      |       |                 |   |       |          |
|                  | E11=96  |     |          |   |     |      |       |                 |   |       |          |
|                  |         |     |          |   |     |      |       |                 |   |       |          |
|                  | E12=119 | 286 | 70656    | + | 45  | 91   |       |                 |   |       |          |
|                  |         | 21  | 394539   | + | 21  | 100  |       |                 |   |       |          |
|                  | E13=143 |     |          |   |     |      |       |                 |   |       |          |
|                  |         |     |          |   |     |      |       |                 |   |       |          |
|                  | E14=113 | 45  | 260644   | - | 25  | 100  |       |                 |   |       |          |
|                  |         | 42  | 284239   | + | 25  | 100  |       |                 |   |       |          |
|                  | E15=76  | 20  | 7701     | + | 20  | 100  |       |                 |   |       |          |
|                  |         |     |          |   |     |      |       |                 |   |       |          |
|                  | E16=134 |     |          |   |     |      |       |                 |   |       |          |
|                  |         |     |          |   |     |      |       |                 |   |       |          |
|                  | E17=126 | 292 | 3223     | + | 28  | 93.8 |       |                 |   |       |          |
|                  |         | 22  | 24224    | - | 20  | 95.5 |       |                 |   |       |          |
|                  | E18=211 | 26  | 5481     | - | 22  | 95.9 |       |                 |   |       |          |
|                  |         | 21  | 206403   | - | 21  | 100  |       |                 |   |       |          |
|                  | E19=596 | 131 | 478      | - | 60  | 74.7 |       |                 |   |       |          |
|                  |         | 179 | 23814    | + | 55  | 93.9 |       |                 |   |       |          |
| <b>Armadillo</b> | E1=371  | 277 | JH566723 | + | 173 | 85.4 |       |                 |   |       |          |
|                  |         | 20  | JH577683 | + | 20  | 100  |       |                 |   |       |          |

|               |         |       |          |   |    |      |  |  |  |  |  |
|---------------|---------|-------|----------|---|----|------|--|--|--|--|--|
|               | E2=162  | 36    | JH564267 | + | 25 | 100  |  |  |  |  |  |
|               |         | 31    | JH570143 | - | 24 | 96.3 |  |  |  |  |  |
|               | E3=328  | 37    | JH575964 | - | 28 | 93.6 |  |  |  |  |  |
|               |         | 28    | JH566673 | - | 22 | 95.9 |  |  |  |  |  |
|               | E4=135  | 38    | JH567186 | + | 29 | 96.8 |  |  |  |  |  |
|               |         | 15118 | JH570430 | - | 28 | 100  |  |  |  |  |  |
|               | E5=150  | 129   | JH566723 | + | 73 | 79.4 |  |  |  |  |  |
|               |         | 26    | JH569432 | - | 22 | 96   |  |  |  |  |  |
|               | E6=123  | 20    | JH577068 | + | 20 | 100  |  |  |  |  |  |
|               |         |       |          |   |    |      |  |  |  |  |  |
|               | E7=136  |       |          |   |    |      |  |  |  |  |  |
|               |         |       |          |   |    |      |  |  |  |  |  |
|               | E8=700  | 93    | JH562329 | + | 45 | 78.5 |  |  |  |  |  |
|               |         | 46    | JH569587 | + | 43 | 91.4 |  |  |  |  |  |
|               | E9=74   | 22    | JH577761 | - | 22 | 100  |  |  |  |  |  |
|               |         | 23    | JH570793 | - | 21 | 95.7 |  |  |  |  |  |
|               | E10=75  |       |          |   |    |      |  |  |  |  |  |
|               |         |       |          |   |    |      |  |  |  |  |  |
|               | E11=96  | 65    | JH566723 | + | 55 | 92.4 |  |  |  |  |  |
|               |         | 27    | JH569903 | + | 24 | 77   |  |  |  |  |  |
|               | E12=119 | 20    | JH575781 | - | 20 | 100  |  |  |  |  |  |
|               |         |       |          |   |    |      |  |  |  |  |  |
|               | E13=143 | 25    | JH569502 | + | 24 | 84   |  |  |  |  |  |
|               |         | 36    | JH569526 | - | 23 | 100  |  |  |  |  |  |
|               | E14=113 | 21    | JH582994 | + | 21 | 100  |  |  |  |  |  |
|               |         | 21    | JH575483 | + | 21 | 100  |  |  |  |  |  |
|               | E15=76  | 151   | JH583683 | - | 26 | 96.6 |  |  |  |  |  |
|               |         | 26    | JH570731 | + | 24 | 96.2 |  |  |  |  |  |
|               | E16=134 | 24    | JH574710 | + | 23 | 87.5 |  |  |  |  |  |
|               |         | 21    | JH577154 | + | 21 | 100  |  |  |  |  |  |
|               | E17=126 | 20    | JH575723 | - | 20 | 100  |  |  |  |  |  |
|               |         |       |          |   |    |      |  |  |  |  |  |
|               | E18=211 | 22    | JH581209 | - | 22 | 100  |  |  |  |  |  |
|               |         | 20    | JH575150 | - | 20 | 100  |  |  |  |  |  |
|               | E19=596 | 65    | JH574046 | + | 56 | 88.6 |  |  |  |  |  |
|               |         | 60    | JH562375 | + | 54 | 81.4 |  |  |  |  |  |
| <b>Tenrec</b> | E1=371  | 28    | 181397   | + | 27 | 82.2 |  |  |  |  |  |
|               |         | 29    | 286342   | - | 26 | 96.5 |  |  |  |  |  |
|               | E2=162  | 26    | 176182   | - | 23 | 88   |  |  |  |  |  |
|               |         | 26    | 90489    | + | 23 | 88   |  |  |  |  |  |

|                 |         |     |        |   |    |      |        |            |   |       |           |
|-----------------|---------|-----|--------|---|----|------|--------|------------|---|-------|-----------|
|                 | E3=328  | 30  | 277125 | - | 25 | 72.5 |        |            |   |       |           |
|                 |         | 192 | 313126 | + | 25 | 100  |        |            |   |       |           |
|                 | E4=135  | 30  | 239160 | - | 25 | 96.3 |        |            |   |       |           |
|                 |         | 280 | 319640 | + | 25 | 100  |        |            |   |       |           |
|                 | E5=150  | 38  | 322685 | + | 27 | 93.8 |        |            |   |       |           |
|                 |         | 26  | 282186 | - | 25 | 65.4 |        |            |   |       |           |
|                 | E6=123  | 35  | 180947 | + | 25 | 92.9 |        |            |   |       |           |
|                 |         |     |        |   |    |      |        |            |   |       |           |
|                 | E7=136  | 66  | 150496 | + | 31 | 97   |        |            |   |       |           |
|                 |         | 31  | 123496 | - | 27 | 93.6 |        |            |   |       |           |
|                 | E8=700  | 23  | 277442 | + | 23 | 100  |        |            |   |       |           |
|                 |         | 22  | 207871 | + | 22 | 100  |        |            |   |       |           |
|                 | E9=74   | 23  | 276808 | + | 21 | 100  |        |            |   |       |           |
|                 |         | 23  | 184850 | + | 21 | 100  |        |            |   |       |           |
|                 | E10=75  | 25  | 218417 | - | 23 | 96   |        |            |   |       |           |
|                 |         |     |        |   |    |      |        |            |   |       |           |
|                 | E11=96  |     |        |   |    |      |        |            |   |       |           |
|                 |         |     |        |   |    |      |        |            |   |       |           |
|                 | E12=119 | 275 | 314882 | - | 40 | 90   |        |            |   |       |           |
|                 |         | 25  | 284873 | + | 23 | 100  |        |            |   |       |           |
|                 | E13=143 | 31  | 289466 | + | 24 | 88.5 |        |            |   |       |           |
|                 |         |     |        |   |    |      |        |            |   |       |           |
|                 | E14=113 | 33  | 280504 | + | 25 | 96.3 |        |            |   |       |           |
|                 |         | 20  | 274364 | + | 20 | 100  |        |            |   |       |           |
|                 | E15=76  | 24  | 165239 | + | 22 | 100  |        |            |   |       |           |
|                 |         |     |        |   |    |      |        |            |   |       |           |
|                 | E16=134 | 41  | 239813 | + | 27 | 93.6 |        |            |   |       |           |
|                 |         | 29  | 298103 | + | 25 | 75   |        |            |   |       |           |
|                 | E17=126 | 20  | 288540 | - | 20 | 100  |        |            |   |       |           |
|                 |         |     |        |   |    |      |        |            |   |       |           |
|                 | E18=211 | 26  | 302008 | + | 25 | 88.5 |        |            |   |       |           |
|                 |         | 38  | 308741 | - | 24 | 96.3 |        |            |   |       |           |
|                 | E19=596 | 52  | 309222 | - | 49 | 84.7 |        |            |   |       |           |
|                 |         | 54  | 312080 | + | 49 | 83.4 |        |            |   |       |           |
| <b>Elephant</b> | E1=371  | 502 | 20     | + | 29 | 96.8 |        |            |   |       |           |
|                 |         | 30  | 11     | + | 24 | 93.2 |        |            |   |       |           |
|                 | E2=162  | 27  | 31     | - | 24 | 77.8 | 1-162  | scaffold_6 | - | 35.68 | 0.0001172 |
|                 |         | 20  | 10     | + | 20 | 100  | 1-162  | scaffold_5 | - | 23.28 | 0.2091    |
|                 | E3=328  | 38  | 35     | - | 29 | 78.2 | 1-328  | scaffold_6 | - | 62.46 | 3.56E-13  |
|                 |         | 33  | 6      | - | 25 | 77.8 | 84-263 | scaffold_5 | + | 41.98 | 1.914E-07 |

|            |         |     |    |   |     |      |         |            |   |        |          |
|------------|---------|-----|----|---|-----|------|---------|------------|---|--------|----------|
|            | E4=135  | 100 | 3  | + | 42  | 93.8 | 1-135   | scaffold_6 | - | 40.13  | 0.000198 |
|            |         | 51  | 17 | + | 41  | 76.6 | 1-135   | scaffold_5 | - | 27.45  | 0.1869   |
|            | E5=150  | 25  | 75 | - | 22  | 87.5 | 1-150   | scaffold_6 | - | 54.71  | 3.12E-07 |
|            |         |     |    |   |     |      | 1-150   | scaffold_6 | - | 26.87  | 0.52     |
|            | E6=123  | 42  | 6  | - | 36  | 92.9 | 1-123   | scaffold_6 | - | 71.77  | 3.90E-15 |
|            |         | 27  | 2  | + | 22  | 100  | 1-123   | scaffold_6 | - | 24.17  | 0.07     |
|            | E7=136  | 20  | 78 | + | 20  | 100  |         |            |   |        |          |
|            |         |     |    |   |     |      |         |            |   |        |          |
|            | E8=700  | 306 | 6  | - | 147 | 78.3 | 65-395  | scaffold_6 | - | 123.13 | 4.35E-33 |
|            |         | 43  | 7  | - | 37  | 93.1 | 202-395 | scaffold_6 | - | 57.24  | 4.60E-13 |
|            | E9=74   |     |    |   |     |      |         |            |   |        |          |
|            |         |     |    |   |     |      |         |            |   |        |          |
|            | E10=75  | 21  | 5  | - | 21  | 100  |         |            |   |        |          |
|            |         | 22  | 53 | - | 20  | 95.5 |         |            |   |        |          |
|            | E11=96  |     |    |   |     |      |         |            |   |        |          |
|            |         |     |    |   |     |      |         |            |   |        |          |
|            | E12=119 | 20  | 34 | + | 20  | 100  |         |            |   |        |          |
|            |         |     |    |   |     |      |         |            |   |        |          |
|            | E13=143 | 77  | 59 | - | 24  | 100  |         |            |   |        |          |
|            |         | 24  | 44 | - | 23  | 79.2 |         |            |   |        |          |
|            | E14=113 | 300 | 60 | - | 32  | 94.6 |         |            |   |        |          |
|            |         | 21  | 51 | + | 21  | 100  |         |            |   |        |          |
|            | E15=76  |     |    |   |     |      |         |            |   |        |          |
|            |         |     |    |   |     |      |         |            |   |        |          |
|            | E16=134 | 23  | 2  | - | 23  | 100  |         |            |   |        |          |
|            |         |     |    |   |     |      |         |            |   |        |          |
|            | E17=126 | 25  | 32 | - | 22  | 87.5 |         |            |   |        |          |
|            |         | 20  | 5  | - | 20  | 100  |         |            |   |        |          |
|            | E18=211 | 111 | 6  | - | 72  | 80.7 | 1-211   | scaffold_6 | - | 65.15  | 2.41E-13 |
|            |         | 35  | 9  | + | 23  | 100  | 1-211   | scaffold_5 | - | 21.04  | 0.3947   |
|            | E19=596 | 368 | 6  | - | 167 | 80.9 | 4-241   | scaffold_6 | - | 105.07 | 1.39E-29 |
|            |         | 161 | 88 | + | 64  | 93.3 | 355-553 | scaffold_6 | - | 102.87 | 7.15E-29 |
| <b>Dog</b> | E1=371  | 38  | 21 | - | 23  | 96   | 28-356  | 11         | + | 142.66 | 4.01E-42 |
|            |         | 23  | 14 | + | 22  | 87   |         |            |   |        |          |
|            | E2=162  | 27  | 9  | + | 24  | 77.8 |         |            |   |        |          |
|            |         | 25  | 11 | + | 22  | 100  |         |            |   |        |          |
|            | E3=328  | 93  | 11 | + | 54  | 87.9 | 1-328   | 11         | + | 64.84  | 3.05E-14 |
|            |         | 67  | 15 | - | 24  | 100  | 75-307  | 11         | + | 25.64  | 0.002835 |
|            | E4=135  | 52  | 28 | - | 28  | 96.8 | 1-135   | 11         | + | 49.73  | 4.44E-07 |
|            |         | 29  | 35 | + | 25  | 93.2 | 1-135   | 11         | + | 22.65  | 0.9938   |

|              |         |       |    |   |     |      |         |    |   |        |           |
|--------------|---------|-------|----|---|-----|------|---------|----|---|--------|-----------|
|              | E5=150  | 450   | 10 | - | 30  | 100  |         |    |   |        |           |
|              |         | 34    | 11 | - | 27  | 58.7 |         |    |   |        |           |
|              | E6=123  | 71    | 11 | + | 35  | 86.1 | 1-123   | 11 | + | 35.09  | 2.63E-05  |
|              |         | 23    | 17 | + | 21  | 95.7 | 1-123   | 11 | + | 21.08  | 0.213     |
|              | E7=136  | 23    | 18 | + | 23  | 100  |         |    |   |        |           |
|              |         | 22    | 36 | + | 22  | 100  |         |    |   |        |           |
|              | E8=700  | 76    | 12 | - | 44  | 87.8 | 1-700   | 11 | + | 88.45  | 5.99E-23  |
|              |         | 57    | 27 | - | 38  | 87   | 205-395 | 11 | + | 28.96  | 0.000072  |
|              | E9=74   |       |    |   |     |      |         |    |   |        |           |
|              | E10=75  |       |    |   |     |      |         |    |   |        |           |
|              | E11=96  | 58    | 28 | + | 27  | 100  | 1-96    | 11 | + | 44.8   | 8.09E-06  |
|              |         | 282   | 16 | + | 24  | 100  |         |    |   |        |           |
|              | E12=119 | 35    | 1  | - | 25  | 85.8 |         |    |   |        |           |
|              | E13=143 | 42417 | 28 | + | 32  | 97.1 |         |    |   |        |           |
|              |         | 23    | 22 | + | 22  | 87   |         |    |   |        |           |
|              | E14=113 | 62    | x  | - | 25  | 100  |         |    |   |        |           |
|              |         | 23    | 8  | + | 22  | 87   |         |    |   |        |           |
|              | E15=76  | 55    | 11 | + | 35  | 81.9 | 1-76    | 11 | + | 41.65  | 8.57E-07  |
|              |         |       |    |   |     |      | 1-76    | 11 | + | 24.54  | 0.1093    |
|              | E16=134 | 21    | 8  | + | 21  | 100  |         |    |   |        |           |
|              | E17=126 | 26    | 29 | - | 24  | 96.2 | 4-122   | 11 | + | 35.71  | 0.0003089 |
|              |         | 20    | 12 | - | 20  | 100  | 1-126   | 11 | - | 23.99  | 0.3421    |
|              | E18=211 | 31    | 4  | + | 26  | 93.2 | 1-211   | 11 | + | 74.6   | 2.31E-16  |
|              |         | 24    | 18 | - | 22  | 95.9 | 1-211   | 11 | - | 18.18  | 0.9774    |
|              | E19=596 | 58    | 1  | - | 52  | 81.1 | 308-587 | 11 | + | 130.6  | 3.37E-38  |
|              |         | 58    | 2  | - | 50  | 86.8 | 248-589 | 11 | + | 40.16  | 4.312E-09 |
| <b>Horse</b> | E1=371  | 305   | 23 | + | 164 | 77.9 | 1-371   | 23 | + | 192.62 | 2.36E-58  |
|              |         | 45    | 10 | - | 33  | 91.9 |         |    |   |        |           |
|              | E2=162  | 24    | 5  | + | 23  | 83.4 | 1-162   | 23 | + | 50.76  | 3.75E-09  |
|              | E3=328  | 346   | 23 | + | 60  | 86.6 | 1-328   | 23 | + | 38.04  | 6.92E-07  |
|              |         | 36    | 9  | - | 28  | 93.8 | 93-254  | 23 | - | 33.47  | 0.000013  |
|              | E4=135  | 31    | 6  | - | 28  | 77.5 | 1-135   | 23 | + | 67.92  | 1.72E-11  |
|              |         | 43    | 24 | + | 28  | 96.7 | 1-135   | 23 | - | 23.97  | 0.3507    |
|              | E5=150  | 32    | 7  | - | 26  | 82.8 | 1-150   | 23 | + | 74.92  | 2.70E-12  |
|              |         | 30    | 14 | - | 24  | 100  | 1-150   | 23 | + | 24.77  | 0.4435    |

|            |         |       |            |   |     |      |         |    |   |        |           |
|------------|---------|-------|------------|---|-----|------|---------|----|---|--------|-----------|
|            | E6=123  | 73    | 20         | - | 28  | 96.7 | 1-123   | 23 | + | 63.92  | 1.73E-13  |
|            |         | 20    | 21         | - | 20  | 100  | 1-123   | 23 | + | 21.45  | 0.121     |
|            | E7=136  | 22    | 4          | + | 20  | 95.5 |         |    |   |        |           |
|            |         |       |            |   |     |      |         |    |   |        |           |
|            | E8=700  | 45    | 1          | + | 37  | 91.2 | 1-700   | 23 | + | 139.33 | 1.49E-38  |
|            |         | 44    | 11         | + | 36  | 91   | 202-395 | 23 | + | 43.59  | 1.86E-09  |
|            | E9=74   | 26    | 21         | - | 24  | 100  |         |    |   |        |           |
|            |         | 20    | 9          | - | 20  | 100  |         |    |   |        |           |
|            | E10=75  |       |            |   |     |      |         |    |   |        |           |
|            |         |       |            |   |     |      |         |    |   |        |           |
|            | E11=96  | 404   | 29         | - | 30  | 94.2 |         |    |   |        |           |
|            |         |       |            |   |     |      |         |    |   |        |           |
|            | E12=119 | 40    | 1          | - | 29  | 96.9 |         |    |   |        |           |
|            |         | 20    | 29         | + | 20  | 100  |         |    |   |        |           |
|            | E13=143 | 45    | 3          | + | 23  | 96   | 1-143   | 23 | + | 104.78 | 8.02E-23  |
|            |         | 20    | U          | - | 20  | 100  | 1-143   | 23 | + | 34.51  | 0.000088  |
|            | E14=113 | 21    | 11         | + | 21  | 100  | 1-113   | 23 | + | 40.48  | 6.09E-05  |
|            |         | 20    | 6          | + | 20  | 100  | 1-113   | 23 | + | 26.46  | 0.1377    |
|            | E15=76  |       |            |   |     |      | 1-76    | 23 | + | 58.48  | 5.83E-12  |
|            |         |       |            |   |     |      | 1-76    | 23 | - | 23.63  | 0.148     |
|            | E16=134 | 78    | 23         | + | 56  | 85.9 | 1-134   | 23 | + | 58.86  | 1.91E-11  |
|            |         | 27    | 20         | + | 24  | 73.1 | 1-134   | 23 | - | 21.12  | 0.2329    |
|            | E17=126 | 25    | 1          | - | 22  | 100  | 19-109  | 23 | + | 34.97  | 0.0003477 |
|            |         | 20    | 10         | - | 20  | 100  | 1-126   | 23 | - | 26.64  | 0.05058   |
|            | E18=211 | 23    | 10         | - | 21  | 95.7 | 1-211   | 23 | + | 96.3   | 1.63E-22  |
|            |         | 20    | 26         | - | 20  | 100  | 1-211   | 23 | - | 17.65  | 0.9864    |
|            | E19=596 | 198   | 23         | + | 125 | 83   | 294-587 | 23 | + | 132.58 | 5.59E-39  |
|            |         | 191   | 12         | - | 62  | 94.4 | 245-592 | 23 | + | 33.22  | 0.000001  |
| <b>Cow</b> | E1=371  | 36    | 11         | + | 27  | 96.7 | 1-371   | 8  | - | 194.34 | 1.39E-58  |
|            |         | 27    | 9          | + | 26  | 85.2 |         |    |   |        |           |
|            | E2=162  |       |            |   |     |      | 1-162*  | 8  | + | 27.88  | 0.007844  |
|            |         |       |            |   |     |      | 1-162   | 8  | - | 26.34  | 0.01982   |
|            | E3=328  | 78    | 15         | - | 69  | 77   | 1-328   | 8  | - | 48.98  | 1.27E-09  |
|            |         | 71    | 13         | - | 54  | 72.6 | 78-269  | 8  | + | 35.38  | 0.000008  |
|            | E4=135  | 152   | 8          | - | 55  | 91.2 | 1-135   | 8  | - | 69.56  | 1.49E-11  |
|            |         | 39    | 6          | - | 33  | 71.1 | 1-135   | 8  | - | 25.52  | 0.3192    |
|            | E5=150  | 114   | 8          | - | 81  | 80.8 | 1-150   | 8  | - | 67.49  | 2.60E-10  |
|            |         | 57596 | U_JH122057 | + | 26  | 96.6 | 1-150   | 8  | - | 25.82  | 0.5415    |
|            | E6=123  | 40    | 14         | + | 23  | 100  | 1-123   | 8  | - | 66.06  | 9.18E-14  |
|            |         |       |            |   |     |      | 1-123   | 8  | + | 26.23  | 0.01176   |



|                   |         |        |       |   |     |      |          |            |   |        |           |
|-------------------|---------|--------|-------|---|-----|------|----------|------------|---|--------|-----------|
|                   | E8=700  | 301    | 1     | - | 127 | 77.7 | 1-700    | 1          | - | 162.54 | 4.591E-45 |
|                   |         | 36     | 4     | + | 31  | 85.8 | 202-395  | 1          | + | 24     | 0.005807  |
|                   | E9=74   | 26     | 13    | - | 23  | 100  |          |            |   |        |           |
|                   |         | 30     | 16    | + | 22  | 100  |          |            |   |        |           |
|                   | E10=75  | 71     | 9     | + | 25  | 100  |          |            |   |        |           |
|                   |         | 27     | 9     | + | 25  | 100  |          |            |   |        |           |
|                   | E11=96  | 24     | 4     | - | 22  | 95.9 |          |            |   |        |           |
|                   |         |        |       |   |     |      |          |            |   |        |           |
|                   | E12=119 | 270    | 2     | - | 33  | 100  |          |            |   |        |           |
|                   |         | 431    | U0011 | + | 27  | 96.7 |          |            |   |        |           |
|                   | E13=143 | 36     | 7     | - | 25  | 96.3 | 1-143    | 1          | - | 68.05  | 7.556E-13 |
|                   |         | 25     | 16    | + | 23  | 96   | 1-143    | 1          | + | 28.86  | 0.008709  |
|                   | E14=113 | 23     | 4     | + | 21  | 100  | 1-113    | 1          | - | 34.09  | 0.007216  |
|                   |         | 20     | 11    | + | 20  | 100  |          |            |   |        |           |
|                   | E15=76  |        |       |   |     |      | 1-76     | 1          | - | 28.48  | 0.01839   |
|                   |         |        |       |   |     |      |          |            |   |        |           |
|                   | E16=134 | 25     | 2     | + | 24  | 76   |          |            |   |        |           |
|                   |         | 79     | 12    | + | 24  | 100  |          |            |   |        |           |
|                   | E17=126 | 23     | 17    | + | 21  | 95.7 | 1-126    | 1          | - | 50.77  | 9.579E-08 |
|                   |         | 20     | 17    | - | 20  | 100  | 1-126    | 1          | + | 36.09  | 0.0006194 |
|                   | E18=211 | 31     | U0265 | + | 24  | 100  | 1-211    | 1          | - | 73.7   | 1.033E-15 |
|                   |         | 38     | 1     | - | 23  | 100  | 1-211    | 1          | - | 21.93  | 0.2251    |
|                   | E19=596 | 168    | 1     | - | 83  | 88.2 | 320-587# | 1          | - | 99.67  | 7.629E-28 |
|                   |         | 121    | 1     | - | 53  | 79.4 | 4-241#   | 1          | - | 68.85  | 6.332E-18 |
| <b>Guinea Pig</b> | E1=371  | 333754 | 14    | + | 39  | 100  | 1-371    | scaffold_2 | + | 76.24  | 1.94E-20  |
|                   |         | 25     | 22    | + | 25  | 100  |          |            |   |        |           |
|                   | E2=162  | 28     | 8     | + | 22  | 100  |          |            |   |        |           |
|                   |         |        |       |   |     |      |          |            |   |        |           |
|                   | E3=328  | 75     | 12    | + | 33  | 59.5 | 1-328    | scaffold_2 | + | 30.43  | 0.000258  |
|                   |         | 51     | 27    | + | 31  | 80.4 | 81-266   | scaffold_2 | - | 24.1   | 0.01519   |
|                   | E4=135  | 39     | 24    | - | 26  | 93.4 | 1-135    | scaffold_2 | + | 80.57  | 0.000258  |
|                   |         | 260    | 168   | - | 26  | 96.6 | 1-135    | scaffold_2 | + | 24.61  | 0.6848    |
|                   | E5=150  |        |       |   |     |      |          |            |   |        |           |
|                   |         |        |       |   |     |      |          |            |   |        |           |
|                   | E6=123  | 37     | 21    | - | 27  | 65.6 | 1-123    | scaffold_2 | + | 25.92  | 0.01899   |
|                   |         | 22     | 55    | - | 22  | 100  | 1-123    | scaffold_2 | + | 24.35  | 0.05199   |
|                   | E7=136  | 107    | 15    | - | 68  | 87.5 |          |            |   |        |           |
|                   |         | 84     | 14    | + | 57  | 81.5 |          |            |   |        |           |
|                   | E8=700  | 53     | 4     | + | 36  | 78.8 | 1-700    | scaffold_2 | + | 81.68  | 1.36E-20  |
|                   |         | 39     | 5     | - | 31  | 89.8 | 202-395  | scaffold_2 | + | 20.25  | 0.06358   |

|                     |         |     |        |   |     |      |          |                   |   |        |          |
|---------------------|---------|-----|--------|---|-----|------|----------|-------------------|---|--------|----------|
|                     | E9=74   | 391 | 31     | + | 25  | 100  |          |                   |   |        |          |
|                     | E10=75  | 22  | 8      | - | 22  | 100  |          |                   |   |        |          |
|                     | E11=96  | 21  | 11     | + | 21  | 100  |          |                   |   |        |          |
|                     | E12=119 | 256 | 2      | - | 47  | 91.3 |          |                   |   |        |          |
|                     |         | 127 | 66     | + | 47  | 94.5 |          |                   |   |        |          |
|                     | E13=143 |     |        |   |     |      | 1-143    | scaffold_2        | + | 50.76  | 1.64E-08 |
|                     |         |     |        |   |     |      | 1-143    | scaffold_2        | 1 | 26.12  | 0.03476  |
|                     | E14=113 | 33  | 30     | - | 24  | 96.2 |          |                   |   |        |          |
|                     |         | 31  | 54     | + | 24  | 100  |          |                   |   |        |          |
|                     | E15=76  | 20  | 283    | - | 20  | 100  | 1-76     | scaffold_2        | + | 36.37  | 6.40E-05 |
|                     |         |     |        |   |     |      | 1-76     | scaffold_2        | 1 | 24.56  | 0.2146   |
|                     | E16=134 | 76  | 2      | + | 50  | 82.9 | 1-134    | scaffold_2        | + | 53.01  | 1.92E-09 |
|                     |         | 23  | 26     | - | 23  | 100  | 1-134    | scaffold_2        | 1 | 21.67  | 0.4588   |
|                     | E17=126 |     |        |   |     |      |          |                   |   |        |          |
|                     | E18=211 | 299 | 15     | - | 34  | 92.4 |          |                   |   |        |          |
|                     |         | 22  | 44     | - | 20  | 95.5 |          |                   |   |        |          |
|                     | E19=596 | 92  | 156    | - | 61  | 98.6 | 310-587# | scaffold_2        | + | 75.2   | 4.55E-20 |
|                     |         | 67  | 3      | - | 54  | 96.7 | 13-129#  | scaffold_2        | + | 21.29  | 0.01014  |
| <b>Kangaroo Rat</b> | E1=371  | 33  | 5694   | - | 25  | 96.5 | 28-180   | GeneScaffold_1017 | + | 31.18  | 6.10E-06 |
|                     |         | 28  | 0      | - | 25  | 64.3 |          |                   |   |        |          |
|                     | E2=162  | 26  | 167    | + | 23  | 77   |          |                   |   |        |          |
|                     |         | 20  | 6198   | - | 20  | 100  |          |                   |   |        |          |
|                     | E3=328  | 21  | 19945  | + | 21  | 100  | 328      | GeneScaffold_1017 | + | 29.65  | 0.000415 |
|                     |         | 20  | 1642   | + | 20  | 100  | 81-268   | GeneScaffold_5830 | 1 | 44.55  | 2.81E-08 |
|                     | E4=135  | 31  | 6711   | + | 26  | 67.9 | 135      | GeneScaffold_1017 | + | 33.37  | 0.005903 |
|                     |         | 24  | 132020 | - | 23  | 79.2 | 135      | GeneScaffold_1445 | - | 27.32  | 0.1549   |
|                     | E5=150  | 150 | 210    | + | 118 | 89.4 | 150      | GeneScaffold_1017 | + | 127.94 | 1.01E-23 |
|                     |         | 35  | 36492  | + | 24  | 92.9 |          |                   |   |        |          |
|                     | E6=123  | 24  | 1921   | + | 22  | 100  | 123      | GeneScaffold_1017 | + | 41.93  | 6.31E-07 |
|                     |         | 20  | 46256  | - | 20  | 100  | 123      | GeneScaffold_6837 | - | 25.19  | 0.0161   |
|                     | E7=136  | 72  | 856    | + | 41  | 78.8 |          |                   |   |        |          |
|                     |         | 526 | 13685  | + | 39  | 95.5 |          |                   |   |        |          |
|                     | E8=700  | 35  | 298    | - | 23  | 100  |          |                   |   |        |          |
|                     |         | 24  | 1562   | + | 22  | 100  |          |                   |   |        |          |
|                     | E9=74   | 26  | 35416  | - | 23  | 100  |          |                   |   |        |          |
|                     |         | 23  | 4051   | - | 21  | 100  |          |                   |   |        |          |

|            |         |        |       |   |    |      |  |  |  |  |  |
|------------|---------|--------|-------|---|----|------|--|--|--|--|--|
|            | E10=75  |        |       |   |    |      |  |  |  |  |  |
|            | E11=96  | 21     | 2622  | + | 21 | 100  |  |  |  |  |  |
|            |         | 21     | 2622  | + | 21 | 100  |  |  |  |  |  |
|            | E12=119 | 94     | 3960  | + | 40 | 91.7 |  |  |  |  |  |
|            |         | 35     | 24954 | - | 30 | 97   |  |  |  |  |  |
|            | E13=143 |        |       |   |    |      |  |  |  |  |  |
|            | E14=113 |        |       |   |    |      |  |  |  |  |  |
|            | E15=76  |        |       |   |    |      |  |  |  |  |  |
|            | E16=134 | 20     | 42896 | - | 20 | 100  |  |  |  |  |  |
|            |         | 20     | 15144 | - | 20 | 100  |  |  |  |  |  |
|            | E17=126 | 23     | 5154  | - | 21 | 100  |  |  |  |  |  |
|            |         | 20     | 36887 | - | 20 | 100  |  |  |  |  |  |
|            | E18=211 | 41     | 12528 | + | 25 | 96.3 |  |  |  |  |  |
|            |         | 25     | 12734 | + | 21 | 95.9 |  |  |  |  |  |
|            | E19=596 | 21577  | 1     | - | 70 | 93.9 |  |  |  |  |  |
|            |         | 58     | 79    | + | 54 | 82.8 |  |  |  |  |  |
| <b>Rat</b> | E1=371  | 33     | 5     | - | 25 | 100  |  |  |  |  |  |
|            |         | 25     | 7     | + | 24 | 88   |  |  |  |  |  |
|            | E2=162  | 30     | 7     | + | 26 | 79.4 |  |  |  |  |  |
|            |         | 300    | 15    | + | 25 | 100  |  |  |  |  |  |
|            | E3=328  | 30     | 8     | - | 28 | 70   |  |  |  |  |  |
|            |         | 378    | 7     | + | 26 | 100  |  |  |  |  |  |
|            | E4=135  | 124    | 5     | - | 30 | 96.9 |  |  |  |  |  |
|            |         | 29     | 14    | - | 27 | 72.5 |  |  |  |  |  |
|            | E5=150  | 472    | 2     | + | 30 | 100  |  |  |  |  |  |
|            |         | 22     | 9     | - | 20 | 95.5 |  |  |  |  |  |
|            | E6=123  | 67     | 18    | + | 24 | 100  |  |  |  |  |  |
|            | E7=136  | 203891 | 1     | - | 50 | 90.2 |  |  |  |  |  |
|            |         | 78     | 12    | + | 44 | 77.2 |  |  |  |  |  |
|            | E8=700  | 26     | 3     | - | 25 | 88.5 |  |  |  |  |  |
|            |         | 26     | 2     | - | 22 | 92.4 |  |  |  |  |  |
|            | E9=74   | 20     | 7     | - | 20 | 100  |  |  |  |  |  |
|            | E10=75  | 23     | 1     | - | 22 | 87   |  |  |  |  |  |



|                   |         |     |                 |   |    |      |       |                   |   |       |             |
|-------------------|---------|-----|-----------------|---|----|------|-------|-------------------|---|-------|-------------|
|                   | E12=119 | 72  | 12              | - | 33 | 86.2 |       |                   |   |       |             |
|                   |         | 94  | 6               | + | 33 | 67.5 |       |                   |   |       |             |
|                   | E13=143 | 23  | X               | + | 22 | 87   |       |                   |   |       |             |
|                   |         | 20  | 1               | - | 20 | 100  |       |                   |   |       |             |
|                   | E14=113 | 22  | 17              | - | 20 | 95.5 |       |                   |   |       |             |
|                   |         | 20  | 19              | + | 20 | 100  |       |                   |   |       |             |
|                   | E15=76  |     |                 |   |    |      |       |                   |   |       |             |
|                   |         |     |                 |   |    |      |       |                   |   |       |             |
|                   | E16=134 | 26  | 14              | - | 24 | 100  |       |                   |   |       |             |
|                   |         | 30  | 11              | + | 24 | 90   |       |                   |   |       |             |
|                   | E17=126 | 20  | 9               | - | 20 | 100  |       |                   |   |       |             |
|                   |         | 20  | 2               | + | 20 | 100  |       |                   |   |       |             |
|                   | E18=211 | 31  | 9               | - | 25 | 90.4 |       |                   |   |       |             |
|                   |         | 27  | 4               | + | 24 | 69.3 |       |                   |   |       |             |
|                   | E19=596 | 236 | 1               | - | 58 | 95.4 |       |                   |   |       |             |
|                   |         | 84  | 7               | - | 57 | 93.8 |       |                   |   |       |             |
| <b>Tree Shrew</b> | E1=371  | 29  | 11608.1-153621  | - | 26 | 82.8 |       |                   |   |       |             |
|                   |         | 24  | 12793.1-295593  | - | 24 | 100  |       |                   |   |       |             |
|                   | E2=162  | 26  | 137324.1-225074 | - | 23 | 84   | 1-162 | GeneScaffold_4495 | - | 24.16 | 0.09483     |
|                   |         |     |                 |   |    |      |       |                   |   |       |             |
|                   | E3=328  | 46  | 149005.1-175128 | - | 41 | 64.5 | 1-328 | GeneScaffold_4495 | - | 42.87 | 8.299E-08   |
|                   |         | 45  | 113065.1-313317 | - | 35 | 88.9 | 1-328 | GeneScaffold_4495 | - | 42.87 | 8.299E-08   |
|                   | E4=135  | 26  | 121089.1-179439 | + | 25 | 80.8 | 1-135 | GeneScaffold_4495 | - | 55.12 | 4.687E-08   |
|                   |         | 24  | 117713.1-193458 | - | 23 | 79.2 | 1-135 | scaffold_143574   | - | 27.99 | 0.1079      |
|                   | E5=150  | 20  | 138816.1-165090 | - | 20 | 100  |       |                   |   |       |             |
|                   |         | 20  | 123001.1-225613 | - | 20 | 100  |       |                   |   |       |             |
|                   | E6=123  | 21  | 150588.1-190788 | + | 21 | 100  |       |                   |   |       |             |
|                   |         |     |                 |   |    |      |       |                   |   |       |             |
|                   | E7=136  | 55  | 14353.1-406122  | - | 44 | 85.2 |       |                   |   |       |             |
|                   |         | 72  | 129769.1-51628  | + | 42 | 72   |       |                   |   |       |             |
|                   | E8=700  | 62  | 150588.1-190788 | - | 46 | 87.1 |       |                   |   |       |             |
|                   |         | 37  | 131051.1-185533 | + | 34 | 89.2 |       |                   |   |       |             |
|                   | E9=74   | 167 | 134928.1-13767  | - | 27 | 96.6 |       |                   |   |       |             |
|                   |         | 30  | 130710.1-187393 | + | 22 | 95.9 |       |                   |   |       |             |
|                   | E10=75  | 71  | 103637.1-14656  | - | 49 | 86.6 |       |                   |   |       |             |
|                   |         | 32  | 115074.1-137271 | - | 28 | 96.8 |       |                   |   |       |             |
|                   | E11=96  |     |                 |   |    |      | 1-96  | GeneScaffold_4495 | - | 47.55 | 0.000003499 |
|                   |         |     |                 |   |    |      |       |                   |   |       |             |
|                   | E12=119 | 91  | 143312.1-125063 | + | 49 | 75.9 |       |                   |   |       |             |
|                   |         | 186 | 93744.1-11733   | + | 38 | 89.6 |       |                   |   |       |             |

|                    |         |        |                 |   |     |      |         |                   |   |        |            |
|--------------------|---------|--------|-----------------|---|-----|------|---------|-------------------|---|--------|------------|
|                    | E13=143 | 21     | 100804.1-9163   | + | 21  | 100  | 1-143   | GeneScaffold_4495 | - | 39.14  | 0.00001541 |
|                    |         |        |                 |   |     |      | 1-143   | scaffold_134426   | - | 23.87  | 0.1279     |
|                    | E14=113 | 28     | 118084.1-760553 | - | 25  | 74.1 | 1-113   | GeneScaffold_4495 | - | 44.19  | 0.00002124 |
|                    |         | 33     | 134874.1-270347 | + | 25  | 100  |         |                   |   |        |            |
|                    | E15=76  |        |                 |   |     |      |         |                   |   |        |            |
|                    | E16=134 | 22     | 124158.1-7356   | - | 22  | 100  |         |                   |   |        |            |
|                    | E17=126 | 27     | 8446.1-217465   | - | 24  | 96.2 |         |                   |   |        |            |
|                    |         | 24     | 129914.1-265838 | + | 22  | 95.9 |         |                   |   |        |            |
|                    | E18=211 | 38     | 117713.1-193458 | + | 35  | 75.7 | 1-211   | GeneScaffold_4495 | - | 68.75  | 1.877E-14  |
|                    |         | 24     | 150503.1-305525 | - | 23  | 79.2 | 1-211   | scaffold_113228   | - | 22.12  | 0.1531     |
|                    | E19=596 | 268    | 11122.1-59405   | + | 60  | 94.1 |         |                   |   |        |            |
|                    |         | 54     | 126320.1-397028 | - | 46  | 92.6 |         |                   |   |        |            |
| <b>Mouse Lemur</b> | E1=371  | 178    | 1070            | + | 105 | 84   | 181-329 | scaffold_1070     | + | 22.01  | 0.005474   |
|                    |         | 311    | 2881            | - | 32  | 97.2 |         |                   |   |        |            |
|                    | E2=162  | 27     | 5065            | + | 24  | 77.8 | 1-162   | scaffold_1070     | + | 60.39  | 3.029E-11  |
|                    |         | 25     | 1358            | - | 23  | 100  | 1-162   | GeneScaffold_1621 | - | 33.39  | 0.000361   |
|                    | E3=328  | 74     | 958             | - | 61  | 73   | 1-328   | scaffold_1070     | + | 58     | 4.852E-12  |
|                    |         | 82     | 15402           | + | 57  | 74.3 | 80-268  | GeneScaffold_299  | - | 29.89  | 0.000355   |
|                    | E4=135  | 123    | 1070            | + | 81  | 82.2 | 1-135   | scaffold_1070     | + | 90.94  | 1.854E-16  |
|                    |         | 32     | 767             | - | 27  | 87.1 | 1-135   | scaffold_1591     | + | 27.2   | 0.165      |
|                    | E5=150  | 128    | 1070            | + | 98  | 88.9 | 1-150   | scaffold_1070     | + | 121.47 | 2.815E-22  |
|                    |         | 142    | 10817           | - | 27  | 93.6 |         |                   |   |        |            |
|                    | E6=123  | 123    | 1070            | + | 83  | 83.8 | 1-123   | scaffold_1070     | + | 93.98  | 1.921E-21  |
|                    |         | 20     | 116145          | - | 20  | 100  | 1-123   | GeneScaffold_2064 | - | 21.47  | 0.3225     |
|                    | E7=136  | 117    | 3233            | + | 69  | 88   | 1-136   | scaffold_1070     | + | 72.69  | 2.27E-14   |
|                    |         | 107    | 30              | - | 68  | 80   | 1-136   | GeneScaffold_2308 | + | 60.6   | 3.71E-11   |
|                    | E8=700  | 159299 | 1144            | + | 42  | 95.8 |         |                   |   |        |            |
|                    |         | 403    | 847             | + | 34  | 100  |         |                   |   |        |            |
|                    | E9=74   | 444    | 80721           | + | 27  | 93.6 |         |                   |   |        |            |
|                    |         | 33     | 6243            | + | 26  | 70   |         |                   |   |        |            |
|                    | E10=75  | 64     | 432             | + | 46  | 87.4 |         |                   |   |        |            |
|                    |         | 28     | 2502            | + | 27  | 89.3 |         |                   |   |        |            |
|                    | E11=96  | 49     | 1070            | + | 42  | 93.8 | 1-96    | scaffold_1070     | + | 73.83  | 2.074E-12  |
|                    |         |        |                 |   |     |      | 1-96    | GeneScaffold_2001 | + | 27.1   | 0.245      |
|                    | E12=119 | 135    | 79              | + | 87  | 90.8 | 1-119   | scaffold_1070     | + | 49.62  | 2.16E-08   |
|                    |         | 136    | 91              | + | 85  | 89.1 | 1-119   | GeneScaffold_3375 | - | 88.57  | 1.04E-18   |
|                    | E13=143 | 104    | 11002           | - | 27  | 96.6 |         |                   |   |        |            |
|                    |         | 23     | 901             | - | 21  | 95.7 |         |                   |   |        |            |

|                |         |     |        |   |    |      |        |                   |   |        |             |
|----------------|---------|-----|--------|---|----|------|--------|-------------------|---|--------|-------------|
|                | E14=113 | 98  | 1070   | + | 62 | 87.1 | 1-113  | scaffold_1070     | + | 48.03  | 0.000002552 |
|                |         | 23  | 132    | + | 22 | 87   |        |                   |   |        |             |
|                | E15=76  | 28  | 3288   | - | 22 | 95.9 |        |                   |   |        |             |
|                |         |     |        |   |    |      |        |                   |   |        |             |
|                | E16=134 | 89  | 638    | + | 24 | 100  | 1-134  | scaffold_1070     | + | 42.47  | 0.000001228 |
|                |         |     |        |   |    |      | 1-134  | GeneScaffold_3279 | + | 24.52  | 0.07728     |
|                | E17=126 | 23  | 834    | - | 21 | 95.7 |        |                   |   |        |             |
|                |         | 21  | 30     | - | 21 | 100  |        |                   |   |        |             |
|                | E18=211 | 46  | 9700   | + | 24 | 96.3 |        |                   |   |        |             |
|                |         | 24  | 133193 | - | 22 | 100  |        |                   |   |        |             |
|                | E19=596 | 120 | 355    | + | 50 | 76   |        |                   |   |        |             |
|                |         | 53  | 51     | + | 49 | 81.2 |        |                   |   |        |             |
| <b>Tarsier</b> | E1=371  | 43  | 3144   | + | 25 | 96.3 |        |                   |   |        |             |
|                |         | 29  | 33897  | - | 24 | 77.8 |        |                   |   |        |             |
|                | E2=162  | 27  | 10137  | - | 26 | 74.1 | 1-162  | scaffold_3388     | + | 31.09  | 0.001449    |
|                |         | 27  | 440905 | - | 23 | 88   | 1-162  | GeneScaffold_5108 | - | 32.01  | 0.000828    |
|                | E3=328  | 86  | 3388   | + | 74 | 87.1 | 1-328  | scaffold_3388     | + | 84.78  | 1.557E-19   |
|                |         | 83  | 525961 | - | 66 | 73.5 | 83-264 | scaffold_3641     | + | 42.55  | 1.019E-07   |
|                | E4=135  | 67  | 248383 | + | 29 | 96.8 |        |                   |   |        |             |
|                |         | 27  | 411220 | - | 26 | 70.4 |        |                   |   |        |             |
|                | E5=150  | 111 | 3388   | + | 82 | 88.1 | 1-150  | scaffold_3388     | + | 106.96 | 4.94E-19    |
|                |         | 27  | 42816  | - | 25 | 77.8 |        |                   |   |        |             |
|                | E6=123  | 20  | 15092  | - | 20 | 100  | 1-123  | scaffold_3388     | + | 36.02  | 0.00002808  |
|                |         |     |        |   |    |      | 1-123  | scaffold_7921     | - | 24.33  | 0.05104     |
|                | E7=136  | 117 | 5427   | + | 73 | 92   | 1-136  | scaffold_3388     | + | 52.78  | 0.05195     |
|                |         | 108 | 3407   | + | 67 | 86.1 | 1-136  | scaffold_3388     | - | 66.13  | 1.258E-12   |
|                | E8=700  | 88  | 1412   | + | 45 | 91   |        |                   |   |        |             |
|                |         | 62  | 8886   | + | 42 | 83.9 |        |                   |   |        |             |
|                | E9=74   | 35  | 44235  | + | 23 | 100  |        |                   |   |        |             |
|                |         | 23  | 39658  | + | 22 | 87   |        |                   |   |        |             |
|                | E10=75  | 69  | 3534   | + | 52 | 90.7 |        |                   |   |        |             |
|                |         | 114 | 137510 | + | 28 | 96.9 |        |                   |   |        |             |
|                | E11=96  | 54  | 8886   | + | 48 | 94.5 |        |                   |   |        |             |
|                |         | 23  | 452194 | + | 21 | 100  |        |                   |   |        |             |
|                | E12=119 | 141 | 17473  | - | 75 | 92.2 |        |                   |   |        |             |
|                |         | 137 | 38709  | + | 73 | 90.2 |        |                   |   |        |             |
|                | E13=143 | 27  | 19476  | - | 24 | 100  |        |                   |   |        |             |
|                |         | 26  | 151605 | + | 24 | 96.2 |        |                   |   |        |             |
|                | E14=113 | 33  | 6797   | + | 23 | 96   |        |                   |   |        |             |
|                |         | 20  | 5216   | + | 20 | 100  |        |                   |   |        |             |

|                 |         |        |                |   |     |      |         |                |   |        |            |
|-----------------|---------|--------|----------------|---|-----|------|---------|----------------|---|--------|------------|
|                 | E15=76  |        |                |   |     |      | 1-76    | scaffold_13816 | + | 43.5   | 4.642E-07  |
|                 |         |        |                |   |     |      | 1-76    | scaffold_40813 | - | 25.4   | 0.1171     |
|                 | E16=134 | 62     | 13816          | + | 52  | 92   | 1-134   | scaffold_13816 | + | 66.23  | 5.478E-13  |
|                 |         |        |                |   |     |      | 1-134   | scaffold_4635  | - | 22.14  | 0.3341     |
|                 | E17=126 | 327    | 482722         | - | 24  | 100  | 1-126   | scaffold_13816 | + | 81.8   | 6.481E-16  |
|                 |         | 326    | 15314          | + | 24  | 100  | 1-126   | scaffold_14481 | - | 29.07  | 0.03162    |
|                 | E18=211 | 69     | 13816          | + | 49  | 85.6 | 1-211   | scaffold_13816 | + | 97.79  | 1.69E-22   |
|                 |         | 24     | 44096          | - | 23  | 87.5 | 1-211   | scaffold_13473 | + | 19.95  | 0.6108     |
|                 | E19=596 | 437    | 13816          | + | 188 | 85.4 | 296-587 | scaffold_13816 | + | 134.36 | 4.026E-39  |
|                 |         | 60     | 3416           | + | 54  | 81.7 | 248-589 | scaffold_9615  | + | 27.31  | 0.000114   |
| <b>Marmoset</b> | E1=371  | 364    | 1              | + | 311 | 91   | 1-371   | 1              | + | 421.17 | 2.31E-131  |
|                 |         | 47     | 4              | + | 28  | 100  |         |                |   |        |            |
|                 | E2=162  | 162    | 1              | + | 135 | 92.5 | 1-162   | 1              | + | 141.27 | 2.686E-32  |
|                 |         | 26     | 8              | - | 23  | 76   | 1-162   | 1              | + | 22.39  | 0.3878     |
|                 | E3=328  | 319    | 1              | + | 241 | 88   | 1-328   | 1              | + | 259.07 | 3.738E-68  |
|                 |         | 179    | 1              | - | 120 | 90   | 78-269  | 1              | - | 86.09  | 9.37E-20   |
|                 | E4=135  | 135    | 1              | + | 107 | 91.5 | 1-135   | 1              | + | 144.19 | 8.451E-29  |
|                 |         | 316017 | 16             | + | 42  | 97.9 | 1-135   | 1              | + | 29.42  | 0.06968    |
|                 | E5=150  | 146    | 1              | + | 132 | 95.3 | 1-150   | 1              | + | 167.07 | 2.5E-32    |
|                 |         | 494    | 3              | + | 31  | 94.2 | 1-150   | 1              | - | 31.72  | 0.04668    |
|                 | E6=123  | 127    | 1              | + | 100 | 91.1 | 1-123   | 1              | + | 126.52 | 2.251E-30  |
|                 |         | 3518   | In_ACFV0119136 | - | 20  | 100  | 1-123   | 1              | + | 30.91  | 0.00105    |
|                 | E7=136  | 115    | 12             | - | 97  | 92.2 | 1-136*  | 1              | - | 126.26 | 1.84E-28   |
|                 |         | 117    | 16             | - | 96  | 92.2 | 1-136   | 1              | + | 85.07  | 1.632E-17  |
|                 | E8=700  | 699    | 1              | + | 539 | 90.4 | 1-700   | 1              | + | 637.27 | 2.661E-189 |
|                 |         | 316    | X              | - | 233 | 90.4 | 1-700   | 1              | - | 239.7  | 1.76E-68   |
|                 | E9=74   | 39     | 8              | + | 24  | 96.2 | 1-74    | 1              | + | 71.89  | 2.804E-11  |
|                 |         | 20     | 6              | + | 20  | 100  |         |                |   |        |            |
|                 | E10=75  | 64     | 1              | + | 58  | 95.4 | 1-75    | 1              | + | 86.85  | 1.8E-20    |
|                 |         | 70     | 7              | - | 54  | 89.8 | 1-75    | 1              | - | 29.89  | 0.004163   |
|                 | E11=96  | 95     | 1              | + | 77  | 90.6 | 1-96    | 1              | + | 93.29  | 7.135E-17  |
|                 |         |        |                |   |     |      | 1-96    | 1              | + | 28.62  | 0.1496     |
|                 | E12=119 | 119    | 1              | + | 93  | 89.1 | 1-119   | 1              | + | 118.67 | 1.535E-26  |
|                 |         | 138    | 18             | - | 88  | 88.7 | 1-119   | 1              | - | 92.05  | 1.74E-19   |
|                 | E13=143 | 139    | 1              | + | 114 | 91.4 | 1-143   | 1              | + | 161.42 | 8.738E-37  |
|                 |         | 39     | 8              | - | 26  | 100  | 1-143   | 1              | - | 33.53  | 0.0005926  |
|                 | E14=113 | 111    | 1              | + | 88  | 92.4 | 1-113   | 1              | + | 110.85 | 3.311E-21  |
|                 |         | 231    | 4              | - | 32  | 94.3 | 1-113   | 1              | + | 25.33  | 0.973      |
|                 | E15=76  | 22     | 15             | - | 22  | 100  | 1-76    | 1              | + | 81.07  | 3.955E-18  |
|                 |         |        |                |   |     |      | 1-76    | 1              | - | 27.51  | 0.03878    |

|                |         |     |    |   |     |      |          |    |   |        |            |
|----------------|---------|-----|----|---|-----|------|----------|----|---|--------|------------|
|                | E16=134 | 85  | 1  | + | 70  | 88.3 | 1-134    | 1  | + | 91.12  | 1.716E-19  |
|                |         | 20  | 3  | - | 20  | 100  | 1-134    | 1  | + | 23.31  | 0.2286     |
|                | E17=126 | 21  | 8  | + | 21  | 100  | 1-126    | 1  | + | 100.68 | 1.147E-20  |
|                |         | 20  | 10 | + | 20  | 100  | 1-126    | 1  | + | 29.5   | 0.03448    |
|                | E18=211 | 210 | 1  | + | 170 | 90.5 | 1-211    | 1  | + | 210.71 | 1.277E-53  |
|                |         | 20  | 15 | + | 20  | 100  | 1-211    | 1  | - | 21.49  | 0.3206     |
|                | E19=596 | 224 | 1  | + | 183 | 90.4 | 10-228#  | 1  | + | 157.43 | 2.12E-46   |
|                |         | 87  | 1  | + | 80  | 93.2 | 249-588# | 1  | + | 32.53  | 3.34E-06   |
| <b>Macaque</b> | E1=371  | 371 | 15 | - | 333 | 94.9 | 1-371    | 15 | - | 484.38 | 5.364E-152 |
|                |         | 351 | 11 | + | 34  | 94.6 |          |    |   |        |            |
|                | E2=162  | 160 | 15 | - | 148 | 96.3 | 1-162    | 15 | - | 194.89 | 1.237E-46  |
|                |         | 86  | 15 | - | 70  | 90.7 | 1-162    | 15 | + | 26.74  | 0.0147     |
|                | E3=328  | 311 | 15 | - | 284 | 94.6 | 1-328    | 15 | - | 132.68 | 4.517E-33  |
|                |         | 179 | 15 | + | 134 | 92.2 | 78-269   | 15 | + | 24.48  | 0.008515   |
|                | E4=135  | 135 | 15 | - | 118 | 94.8 | 1-135    | 15 | - | 173.09 | 7.389E-36  |
|                |         | 35  | X  | + | 30  | 96.9 | 1-135    | 15 | - | 30.94  | 0.01604    |
|                | E5=150  | 147 | 15 | - | 134 | 92.6 | 1-150    | 15 | - | 173.61 | 4.498E-34  |
|                |         | 28  | 17 | - | 23  | 96   |          |    |   |        |            |
|                | E6=123  | 122 | 15 | - | 109 | 92.7 | 1-123    | 15 | - | 140.55 | 1.444E-34  |
|                |         | 39  | 2  | - | 25  | 100  | 1-123    | 15 | - | 23.74  | 0.05511    |
|                | E7=136  | 124 | 12 | + | 97  | 84.3 | 1-136    | 15 | - | 170.45 | 1.731E-40  |
|                |         | 117 | 2  | - | 96  | 92.2 | 1-136    | 15 | - | 136.58 | 1.744E-31  |
|                | E8=700  | 699 | 15 | - | 619 | 95.4 | 1-700    | 15 | - | 846.72 | 3.107E-253 |
|                |         | 317 | X  | + | 240 | 89.3 | 1-700    | 15 | - | 252.03 | 1.65E-72   |
|                | E9=74   | 74  | 15 | - | 62  | 91.9 | 1-74     | 15 | - | 89.62  | 1.052E-15  |
|                |         | 25  | 5  | - | 24  | 84   |          |    |   |        |            |
|                | E10=75  | 75  | 15 | - | 69  | 96   | 1-75     | 15 | - | 101.89 | 2.457E-25  |
|                |         | 425 | 1  | + | 57  | 89.2 | 1-75     | 15 | + | 22.27  | 0.4598     |
|                | E11=96  | 96  | 15 | - | 92  | 98   | 1-96     | 15 | - | 117.5  | 6.873E-23  |
|                |         | 20  | 12 | - | 20  | 100  |          |    |   |        |            |
|                | E12=119 | 107 | 15 | - | 95  | 94.4 | 1-119    | 15 | - | 149.28 | 6.239E-35  |
|                |         | 143 | 4  | + | 86  | 90.7 | 1-119    | 15 | - | 90.5   | 2.345E-19  |
|                | E13=143 | 143 | 15 | - | 131 | 95.9 | 1-143    | 15 | - | 191.11 | 1.092E-44  |
|                |         | 34  | 7  | + | 29  | 96.9 | 1-143    | 15 | + | 27.78  | 0.009274   |
|                | E14=113 | 113 | 15 | - | 95  | 95.3 | 1-113    | 15 | - | 129.37 | 6.365E-26  |
|                |         | 268 | 4  | + | 26  | 96.5 |          |    |   |        |            |
|                | E15=76  | 76  | 15 | - | 66  | 93.5 | 1-76     | 15 | - | 105.7  | 9.18E-26   |
|                |         |     |    |   |     |      | 1-76     | 15 | + | 25.42  | 0.08514    |
|                | E16=134 | 133 | 15 | - | 122 | 94   | 1-134    | 15 | - | 160.14 | 3.216E-38  |
|                |         | 184 | 1  | + | 27  | 96.6 | 1-134    | 15 | - | 22.23  | 0.232      |

|                  |         |     |           |   |     |      |         |    |   |        |            |
|------------------|---------|-----|-----------|---|-----|------|---------|----|---|--------|------------|
|                  | E17=126 | 106 | 15        | - | 97  | 92.5 | 1-126   | 15 | - | 146.6  | 7.217E-33  |
|                  |         | 20  | 7         | + | 20  | 100  | 1-126   | 15 | - | 25.17  | 0.2404     |
|                  | E18=211 | 211 | 15        | - | 185 | 93.9 | 1-211   | 15 | - | 263.39 | 1.714E-68  |
|                  |         | 24  | 11        | - | 23  | 87.5 | 1-211   | 15 | - | 18.71  | 0.9882     |
|                  | E19=596 | 539 | 15        | - | 478 | 92.5 | 1-596   | 15 | - | 635.42 | 1.63E-200  |
|                  |         | 142 | X         | - | 88  | 85.5 | 250-587 | 15 | + | 39.18  | 1.27E-08   |
| <b>Orangutan</b> | E1=371  | 371 | 9         | - | 359 | 98.4 | 1-371   | 9  | - | 482.43 | 2.79E-151  |
|                  |         | 27  | 15        | + | 25  | 100  |         |    |   |        |            |
|                  | E2=162  | 157 | 9         | - | 141 | 96.1 | 1-162   | 9  | - | 154.2  | 7.048E-36  |
|                  |         | 60  | 9         | - | 52  | 93.4 | 1-162   | 9  | + | 20.32  | 0.8676     |
|                  | E3=328  | 330 | 9         | - | 300 | 98.1 | 1-328   | 9  | - | 307.29 | 7.734E-82  |
|                  |         | 198 | 9         | + | 146 | 94.6 | 81-266  | 9  | + | 98.53  | 1.99E-23   |
|                  | E4=135  | 133 | 9         | - | 123 | 96.3 | 1-135   | 9  | - | 165.16 | 6.561E-34  |
|                  |         | 57  | 14        | + | 29  | 87.9 | 1-135   | 9  | + | 25.38  | 0.3971     |
|                  | E5=150  | 150 | 9         | - | 140 | 96.7 | 1-150   | 9  | - | 180.35 | 1.717E-35  |
|                  |         | 38  | 8         | - | 28  | 83.9 | 1-150   | 9  | + | 27.55  | 0.2579     |
|                  | E6=123  | 123 | 9         | - | 113 | 96   | 1-123   | 9  | - | 146.58 | 3.695E-36  |
|                  |         | 21  | X         | - | 21  | 100  | 1-123   | 9  | - | 24.13  | 0.05255    |
|                  | E7=136  | 136 | 9         | - | 118 | 93.4 | 1-136   | 9  | - | 149.03 | 1.051E-34  |
|                  |         | 137 | 26        | + | 102 | 91.2 | 1-136   | 9  | + | 127.79 | 4.649E-29  |
|                  | E8=700  | 699 | 9         | - | 653 | 97.2 | 1-700   | 9  | - | 816.99 | 4.132E-244 |
|                  |         | 315 | 7         | + | 241 | 90.4 | 1-700   | 9  | - | 252.38 | 1.593E-72  |
|                  | E9=74   | 34  | 11_random | + | 24  | 100  |         |    |   |        |            |
|                  |         | 21  | 4         | - | 21  | 100  |         |    |   |        |            |
|                  | E10=75  | 416 | 1         | + | 44  | 91   |         |    |   |        |            |
|                  |         | 52  | 1         | - | 40  | 90   |         |    |   |        |            |
|                  | E11=96  | 96  | 9         | - | 92  | 98   | 1-96    | 9  | - | 118.16 | 5.893-23   |
|                  |         | 25  | 12        | + | 24  | 76   |         |    |   |        |            |
|                  | E12=119 | 119 | 9         | - | 111 | 96.7 | 1-119   | 9  | - | 147.88 | 1.805E-34  |
|                  |         | 120 | 15_random | - | 88  | 90.7 | 1-119   | 9  | - | 92.85  | 6.86E-20   |
|                  | E13=143 | 143 | 9         | - | 135 | 97.3 | 1-143   | 9  | - | 188.51 | 6.228E-44  |
|                  |         | 24  | 3         | + | 22  | 95.9 | 1-143   | 9  | - | 33.89  | 0.0003091  |
|                  | E14=113 | 107 | 9         | - | 101 | 97.2 | 1-113   | 9  | - | 125.72 | 5.862E-25  |
|                  |         | 24  | 7         | + | 23  | 87.5 |         |    |   |        |            |
|                  | E15=76  | 76  | 9         | - | 72  | 97.4 | 1-76    | 9  | - | 100.43 | 4.218E-24  |
|                  |         |     |           |   |     |      | 1-76    | 9  | - | 25.4   | 0.1058     |
|                  | E16=134 | 134 | 9         | - | 126 | 97.1 | 1-134   | 9  | - | 151.03 | 1.076E-35  |
|                  |         | 24  | 3         | + | 22  | 95.9 | 1-134   | 9  | - | 22.08  | 0.3117     |
|                  | E17=126 | 119 | 9         | - | 115 | 98.4 | 1-126   | 9  | - | 146.31 | 1.056E-32  |
|                  |         | 21  | 4         | - | 21  | 100  | 1-126   | 9  | + | 27.87  | 0.05851    |

|                |         |       |    |   |     |      |         |   |   |        |             |
|----------------|---------|-------|----|---|-----|------|---------|---|---|--------|-------------|
|                | E18=211 | 211   | 9  | - | 205 | 98.6 | 1-211   | 9 | - | 268.91 | 6.256E-70   |
|                |         | 25    | 6  | + | 24  | 84   | 1-211   | 9 | - | 21.33  | 0.229       |
|                | E19=596 | 603   | 9  | - | 557 | 97.3 | 1-596   | 9 | - | 674.37 | 5.832E-213  |
|                |         | 173   | 20 | - | 59  | 95.6 | 247-590 | 9 | + | 32.29  | 0.000002573 |
| <b>Gorilla</b> | E1=371  | 371   | 9  | + | 365 | 99.2 | 1-371   | 9 | + | 493.1  | 9.311E-155  |
|                |         | 23    | 15 | + | 21  | 95.7 |         |   |   |        |             |
|                | E2=162  | 162   | 9  | + | 160 | 99.4 | 1-162   | 9 | + | 196.8  | 4.351E-47   |
|                |         | 86    | 9  | + | 70  | 90.7 | 1-162   | 9 | + | 196.8  | 0.3084      |
|                | E3=328  | 312   | 9  | + | 301 | 97.5 | 1-328   | 9 | + | 338.47 | 1.32E-90    |
|                |         | 180   | 9  | - | 130 | 93.2 | 81-266  | 9 | - | 107.89 | 4.33E-26    |
|                | E4=135  | 133   | 9  | + | 131 | 99.3 | 1-135   | 9 | + | 172.3  | 1.257E-35   |
|                |         | 62216 | 11 | - | 34  | 97.3 | 1-135   | 9 | + | 24.25  | 0.6616      |
|                | E5=150  | 150   | 9  | + | 148 | 99.4 | 1-150   | 9 | + | 185.72 | 9.799E-37   |
|                |         | 46    | 6  | - | 26  | 100  | 1-150   | 9 | - | 26.88  | 0.3267      |
|                | E6=123  | 123   | 9  | + | 123 | 100  | 1-123   | 9 | + | 156.33 | 6.367E-39   |
|                |         | 25    | 12 | + | 22  | 87.5 | 1-123   | 9 | - | 22.09  | 0.1759      |
|                | E7=136  | 136   | 9  | + | 124 | 95.6 | 1-136   | 9 | + | 155.81 | 1.498E-36   |
|                |         | 131   | 15 | + | 101 | 88.6 | 1-136   | 9 | + | 133.58 | 1.217E-30   |
|                | E8=700  | 695   | 9  | + | 676 | 98.5 | 1-700   | 9 | + | 827.23 | 2.887E-247  |
|                |         | 317   | x  | - | 240 | 92   | 1-700   | 9 | + | 251.88 | 2.041E-72   |
|                | E9=74   | 74    | 9  | + | 72  | 98.7 | 1-74    | 9 | + | 89.91  | 9.968E-16   |
|                |         | 374   | 7  | - | 28  | 100  |         |   |   |        |             |
|                | E10=75  | 75    | 9  | + | 71  | 97.4 | 1-75    | 9 | + | 96.56  | 1.155E-23   |
|                |         | 24    | 6  | + | 22  | 95.9 | 1-75    | 9 | - | 23.79  | 0.1758      |
|                | E11=96  | 96    | 9  | + | 96  | 100  | 1-96    | 9 | + | 122.7  | 4.473E-24   |
|                |         |       |    |   |     |      | 1-96    | 9 | + | 31.61  | 0.01707     |
|                | E12=119 | 119   | 9  | + | 109 | 95.8 | 1-119   | 9 | + | 147.13 | 2.567E-34   |
|                |         | 132   | 14 | - | 85  | 90.4 | 1-119   | 9 | - | 52.29  | 3.47E-09    |
|                | E13=143 | 143   | 9  | + | 143 | 100  | 1-143   | 9 | + | 193.21 | 3.518E-45   |
|                |         | 27    | 8  | + | 23  | 92.6 | 1-143   | 9 | + | 31.94  | 0.000881    |
|                | E14=113 | 107   | 9  | + | 105 | 99.1 | 1-113   | 9 | + | 128.26 | 1.305E-25   |
|                |         |       |    |   |     |      |         |   |   |        |             |
|                | E15=76  | 76    | 9  | + | 76  | 100  | 1-76    | 9 | + | 104.96 | 1.692E-25   |
|                |         |       |    |   |     |      | 1-76    | 9 | + | 25.4   | 0.0957      |
|                | E16=134 | 134   | 9  | + | 132 | 99.3 | 1-134   | 9 | + | 163.76 | 3.841E-39   |
|                |         | 23    | 9  | - | 21  | 100  | 1-134   | 9 | + | 20.51  | 0.7416      |
|                | E17=126 | 123   | 9  | + | 121 | 99.2 | 1-126   | 9 | + | 154.18 | 8.637E-35   |
|                |         | 38    | 6  | - | 28  | 71.9 | 1-126   | 9 | + | 27.95  | 0.05045     |
|                | E18=211 | 211   | 9  | + | 201 | 97.7 | 1-211   | 9 | + | 256.02 | 2.092E-66   |
|                |         | 20    | 9  | - | 20  | 100  |         |   |   |        |             |

|                   |         |         |               |   |     |      |         |   |   |        |            |
|-------------------|---------|---------|---------------|---|-----|------|---------|---|---|--------|------------|
|                   | E19=596 | 595     | 9             | + | 563 | 97.8 | 1-596   | 9 | + | 685.11 | 1.843E-216 |
|                   |         | 490     | 8             | - | 77  | 93.4 | 247-590 | 9 | - | 41.61  | 2.333E-09  |
| <b>Chimpanzee</b> | E1=371  | 371     | 9             | + | 367 | 99.5 | 1-371   | 9 | + | 486    | 2.029E-152 |
|                   |         | 1892628 | _GL391837_ran | + | 28  | 100  |         |   |   |        |            |
|                   | E2=162  | 162     | 9             | + | 156 | 98.2 | 1-162   | 9 | + | 190.85 | 1.787E-45  |
|                   |         | 86      | 9             | + | 68  | 89.6 | 1-162   | 9 | + | 20.25  | 0.9289     |
|                   | E3=328  | 313     | 9             | + | 300 | 98.4 | 1-328   | 9 | + | 347.96 | 3.3E-93    |
|                   |         | 181     | 9             | - | 133 | 95.3 | 81-266  | 9 | - | 119.07 | 3.66E-29   |
|                   | E4=135  | 133     | 9             | + | 129 | 98.5 | 1-135   | 9 | + | 169.76 | 5.6E-35    |
|                   |         | 363842  | 17            | - | 41  | 95.5 |         |   |   |        |            |
|                   | E5=150  | 150     | 9             | + | 146 | 98.7 | 1-150   | 9 | + | 183.54 | 3.411E-36  |
|                   |         | 46      | 6             | - | 26  | 100  | 1-150   | 9 | - | 26.23  | 0.5209     |
|                   | E6=123  | 123     | 9             | + | 121 | 99.2 | 1-123   | 9 | + | 153.57 | 4.227E-38  |
|                   |         | 21      | 6             | - | 21  | 100  | 1-123   | 9 | - | 23.24  | 0.09544    |
|                   | E7=136  | 136     | 9             | + | 128 | 97.1 | 1-136   | 9 | + | 168.75 | 6.177E-40  |
|                   |         | 132     | 2B            | + | 106 | 93.5 | 1-136   | 9 | + | 93.73  | 5.38E-20   |
|                   | E8=700  | 696     | 9             | + | 684 | 99.2 | 1-700   | 9 | + | 864.56 | 1.477E-258 |
|                   |         | 326     | 6             | + | 247 | 91.1 | 1-700   | 9 | + | 200.77 | 7.87E-57   |
|                   | E9=74   | 74      | 9             | + | 68  | 96   | 1-74    | 9 | + | 90.37  | 8.824E-16  |
|                   |         | 374     | 7             | - | 28  | 100  |         |   |   |        |            |
|                   | E10=75  | 75      | 9             | + | 75  | 100  | 1-75    | 9 | + | 104.25 | 5.916E-26  |
|                   |         | 418     | 1             | - | 54  | 86.7 | 1-75    | 9 | + | 23.14  | 0.3139     |
|                   | E11=96  | 96      | 9             | + | 96  | 100  | 1-96    | 9 | + | 122.7  | 5.066E-24  |
|                   |         | 26      | 13            | - | 23  | 100  | 1-96    | 9 | + | 31.73  | 0.01802    |
|                   | E12=119 | 119     | 9             | + | 111 | 96.7 | 1-119   | 9 | + | 147.57 | 2.228E-34  |
|                   |         | 142     | 11            | - | 87  | 91.5 | 1-119   | 9 | - | 97.93  | 3.164E-21  |
|                   | E13=143 | 143     | 9             | + | 143 | 100  | 1-143   | 9 | + | 193.21 | 3.985E-45  |
|                   |         | 490     | 11            | + | 27  | 100  | 1-143   | 9 | + | 31.91  | 0.001018   |
|                   | E14=113 | 107     | 9             | + | 105 | 99.1 | 1-113   | 9 | + | 128.39 | 1.38E-25   |
|                   |         | 20      | 5             | - | 20  | 100  |         |   |   |        |            |
|                   | E15=76  | 76      | 9             | + | 74  | 98.7 | 1-76    | 9 | + | 103.03 | 7.216E-25  |
|                   |         |         |               |   |     |      | 1-76    | 9 | + | 25.4   | 0.1084     |
|                   | E16=134 | 134     | 9             | + | 132 | 99.3 | 1-134   | 9 | + | 163.76 | 4.35E-39   |
|                   |         |         |               |   |     |      | 1-134   | 9 | - | 22.77  | 0.2097     |
|                   | E17=126 | 121     | 9             | + | 117 | 98.4 | 1-126   | 9 | + | 152.51 | 2.652E-34  |
|                   |         | 25      | 18            | - | 22  | 100  | 1-126   | 9 | + | 27.02  | 0.1        |
|                   | E18=211 | 211     | 9             | + | 203 | 98.2 | 1-211   | 9 | + | 254.43 | 6.554E-66  |
|                   |         | 26      | 11            | + | 23  | 80   |         |   |   |        |            |
|                   | E19=596 | 600     | 9             | + | 567 | 98   | 1-596   | 9 | + | 699.06 | 6.795E-221 |
|                   |         | 144     | 1             | - | 66  | 96   | 260-587 | 9 | + | 36.38  | 1.27E-07   |
