# Supplementary material for: ANRIL/CDKN2B-AS shows two-stage clade-specific evolution and becomes conserved after transposon insertions in simians
Source: PubMed Central journal article supplement (PMC3831594; doi:10.1186/1471-2148-13-247), 2013-11-13
Supplement: 1471-2148-13-247-S3.pdf [file 1471-2148-13-247-S3.pdf]

UUAUUCCUGGCUCUUUUCGUCGAAAGUCUCCAUCUUCUCAAACUAGAUUUAUUAAAAUAGAAAAAGGAAGAAAGGAAAGCGAGGUCUUCUUCUUCG  
UCUAUCCGCCAAUCAGGAGGCUGAAUUGUCAGUUUUGAACUAAAAGCCGUCUCCGUCUUCUAGAUUUGGAAAAACAAGCGAAAAUAAACUAAACC  
GCUGCAGCCUCUGACGCGACAUCUGGACACGGCGCGGCGUGGCGCUGCCGGAGCUGCGGGCCCGGCCUGGCGCCGGACUAGGACUAAUUGCCAC  
GACAUUCAAAGGAUCCAAGAGAGAAUUAUUGGUGUCCAUGCUAUGAUGAUUCCUCAGCUCUUCUAGAUUUGGAAAAACAAGCGAAAAUAAACUAAACC  
UCUUUGUGGUAGUUAGGGUGUGGUUAUGGCCACUGAGGCCACACCUAUAUGCUGCAAUUUAAGCACUGAUCUGUCAUCAAUACCACUUGCUGUCU  
UGAAUGUGAAGAUGAUUUUCCUGCAGGGAUCCUCUACAAAAUAAAAACACUGGGCAUGAGGAAAAUAAUUAUCUUGCUUUAAAAUUGUCUUUUU  
UCUUCACUACACCAGGGUCCCAACCCUAGGCCACAGACUGUGGCCUAGUGUAGUGAAUAGAAAAGACAAUUUAAAGCAUGAAUUAUUUUUCC  
UCGUGCCAGUGUUUUAAUUUUUGUACUGGUCUGUGGUUAGAAAACCAGGCUGCACAGCAGAAGGUGGGCAGCAGAUUUGAGAAAACCACAGAA  
AGAGAGAAGUAAAUAUUUUUCCUGUCAAGACCACAUAUGAUGAAGCCAGAAUUUGAGCUCUAGUACUUAACCACUGGACUACCUGCCUGCCC  
UGUCGAGGAACUGCUAAGUGUCCCUUUUGAUGAGAAGAAUAGCCUCAUUCUGAUUCAACAGCAGAGAUAAGAAAAGACUUCUGUUUUCUGGCC  
ACCAGAUUAUGUUAUCUGUGCUUAAAGAAUUGAAAAACACACAUCAAAGGAGAAUUCUCUUGGAAAGAGAGGGUUAAGCAUCACUGUUAGGUGU  
GCUGGAAUCCUUUCCGAGUCAGUACUGCUUUCUAGAAGAAAACCGGGGAGAUUAUUUGGAAUGUAUCUAAUCUCAAAGAAAACCAUCAGAGGUA  
CAGUAGAGACUGGGUUUACCAUGUUGGCCAGACUGGUCUUGAACUCCGACCUCGUAUUCACCCGCCUCGGCCUCCCAAAGUCUGGGAUUA  
GGUGUGAGACACCACGCCCGCAGAUAGAGAGAAUUGUAGACAGUCUCUCCAUGAACGCCUUCACUGAUUCCAAGCAUGAAGaGACACACCAGG  
GAAAAACAAGACCUAACACAGGACAAAUGGAAUUAUAGAAACAUUUUCUAGCAGAAGAACACUUAUCUGUUGCCAUUUGAAUUCUUUGCUUCUU  
CUAGGUUUGACAAUGAGCCUAUCAUAUAAGCCAAAUGUAAACAGAAAAGAGGUUGAAUCAGUCACGUAUAGCCCAAUUAUGCUGUGGUAACAAACA  
ACCUCAAAAUCUCAUUGGCUUAAAAUUAACAGAAUUAUUCUACUCAUGGCACAUUCCAUCUUAUCUGCAGGGGAUCUGCUCACUGAAGUCAC  
UUAGGAACUUGGACUGAUGGAAUGGCCACUUUUUGGUCACUUAUGUAUUAUCUGUUUUAUCCUGCUGAUAAAAGCCAAAAUUGGGAACAAAA  
AGAAGUUUAACUAGACUUAACAGUCCGCAUGGCUGAGGAGGCCUCAGAAUCAUGGUGGGAGGCGAAAGGCACUUCUUAUGGUGGCAGCAUAGA  
AAAUGAGGAAGAAGCAAAGCGAAAACCCUCUGAUAAACCAUUAAGAUCAUUAUGAGACUUAUUUCACUUAUAGAGAAUAGCAUGGGAAAGACCGG  
CCCCUAAUUUUACCUCUCCUGGUCUCCUCCUCAACGUGGAAUUCUGGGAGAAAACAUCUAAAGAUUAGACACAUUAUUUUAAAACAGAAGC  
CUACAAAGAACUCAUAAAUAUAAAGAAUUAUCUUUUCACAAGGUGAUGGAUGCUUUUUAUUUUGCCACAAAACCACUGGUGACGUUGCCUGUGG  
CCACCUUGGAGAUAGACUGGAGGCCUGGGACAUGGAGACUGCUUUUCUGCAGAAAACCACAUCUCCUUGGAGUAAUGAGCUACACCUACCUCAAUUA  
UUCAGUGCAGUACAACACUCCAGACAGGGUCACUCUGUCAUCCCGCUGGAGUGUAUUGGCAUGAUUACAGCUCACUGCGACCUUGAACUCCCA  
GGCUCAAAACCUGAGCAGCUGGGACUACAGGUGCACUACCAUGCAUGGUACCAGAGAUUAUAAUAGAGAAACAGACAUUCUCCUCCUCCUUAUGA  
GGUUAACAGCUUAGUGUGGAGACACACAGAUGCCUAAACGCACUUAUGGUAUGGAAGGUGCUAUGGACACAGUGCUAAAUCCAUGAUCUACAUAGGUG  
GAGAACUUCAGUAGAGGAAGUGGCAGGAAUUGGGAAUAGGAGCACAGUGAUUAAACUGGGGCUAUUCAUAGAGAGUUUAAGAACUCAGACCAG  
UGACUUAGAUUGGCUUCUCUCAUUGGCAAGAAACAUUGCUGCUAGCACUCCCGAGUUCUACGUUCUACAACAUCACCACUGGAUCUUAACAU  
GACGUAAGAUCAAAUGUAAUAGCAUGUCAAAACAUGUGUAACUCCAGUUUAACAAAACUUAUCUGUAUCUCAUUGGGGAUACGAAGCUCUACACACU  
UGAAGAUGGUGAAGGAAUUAUAAAAUCUUAUGUCUCACAGUCCAGACUUGGAGUACAAGUAAUAGAAGAAUAAAACUUAUCCCUUAAGUAGAU  
UCACCAUAAGUUAGCUCAGAGCAAUUCAGUGCAAGUAUGGUCUGUAUCCAUAUAGUAUCUUAACAGACAGCAAGUUGAACACUGUGGGAUGCUUAA  
GCUAUUGAGGCCUUUGCAGCUUUCUGCUAUAUGGAGGCUAGGGCCAGAGUCAAGAUUUAUGCUUUGCAGCACACUGGUCUUCUGUUUUUGCAAUC  
AGAUAAAUGAUUUGUAAAUGAGGUCUGAGAGCAUGGGAGAUACUAAUGUGUGUUUCCUUGAGGCUACUGCAUAGUUAGGAAAUUGAAUACAGA  
AAGAUGAAAUUGAUUUGCCCAAGCAUUAAGAUCAAAGCUGUGGCAGAACCAGGACUGGAACCUUAUUCUCUCUACUAAACGGUUUUUAAAAAAA  
UAACCUUGUUUAAAAAAUUAUAAAAAGUCACAAGAAAAGGUAACAUGUGGAUAAAACAAAUGAGGAAAAUAAAAUUUUAUCCAGUAAUAAACAUUUG  
GCAUACAUCUUUCUGGUAUUAUUCCUGUGUUGCAUUAUCAUCUCCAUCAUCAUUAUAUCCAUCAUUAUCAUCAUCAUCAUGcACCAUCAUCA  
UCAUCAUUAUCAUACCAUAGCGAACACUAAUGCUUACCUAGUGCCAGAUUGCUGCUAUGGCAUUUUAUGUGUUAACUGGUAACUCAUGUAAUCC  
UCAUAAACAACCUUAUAAAGGUGGUUGCUAUAUCCCAUGUUAUCAUUAAGAGACAGAAGCAUAAAAGAGUUGCAGCUAGUAAUUGGCGGGAU  
UGAACUUAAGCAGUCUAAACCUAAGAGUAAUGAUUUUAAACAUCUAGCUAUAUCAUACAAUUUACAAAUAUAAACUGGGCUCAGACAAUAAA

**Orangutan ANRIL**

AGCUACAUCUGACACCGCCUACCAGGAACAGCCGCGUCCCGCGGAUUCUGGUGCUGCUCGCGUCCCGCUCUCCCUAAUCCCUUAUU  
UUAUUCCUGGCUCUUUUCGUCGAAAGUCUCCAUCUUCUCAAACUAGAUUUAUUAAAAUAGAAAAAGGAAGAAAGGAAAGCGAGGUCUUCUUCUUCG  
UCUAUCCGCCAAUCAGGAGGCUGAAUUGUCAGUUUUGAACUAAAAGCCGUCUCCGUCUUCUAGAUUUGGAAAAACAAGCGAAAAUAAACUAAACC  
GCUGCAGCCUCUGAUGCGACAUCUGGACACUGGCGUGGCGUGGCGCUGCCGGAGCUGCGGGCCCGGCCUGGCGCCGGACUAGGACUAAUUGCCAC  
GACAUUCAAAGGAUCCAAGAGAGAAUUAUUGGUGUCCUGCUAUGAUGAUUCCUCAGCUCUUCUAGAUUUGGAAAAACAAGCGAAAAUAAACUAAACC  
UCUuuuuUUGUGGUAGUUAGGGUGUGGUUAUGG-CACUGAGGCCACACUUAUCUGCUGCAAUUUAAGCACUGAUCUGUCAUCAAUACCACUUGCU  
GUCUUGGAUGUGAAGAUGAUUUUCCUGUAGGGAUUCCUCUACAAAAUAAAAACACUGGGCAUGAGGAAUAAUUAUCAUGCUUUAAAAUUGUCU



ACTGGTCTTGAACCTCTGACCTCATGATTTGCCCGCTCAGCCTCCCAAAGTGCTGGGATTACAGGTGTGAGCCACCACGCCCGGGACAGAGAG  
CATTTTGACAGTCTCTCCAATGAACACCTTCACTGATATCCAAAGCATGAAGACACACCAGGAAAAACATGGACCTAACACAGGACAAATTTGAAT  
TATTAGAAACATTTTCTAGGAGAAGAACTACTTCTGTTGCCATTTGAATCTTTGCTTCTTTCTAGGTTTGACAATGAGCCTATCATACAAGCCCA  
AATGTAACAGAGAGAGGTTGAATCAGTCACGATAAACCCAGTTATGCTGTGGTAACAAACAACCTCAAAGTCTCACTGGCTTAAAATACACAGAA  
TTATTCTTACTCATGGCACATATCCATCAATCATCTGCAGGGGATCTGCTCACTGAAGTCACTTAGGAACTTCGACTGATGGAAGTCCACTTTTT  
GGTCGCTATATGTATTAATCTGTTTTTCATGCTGCTGATAAAGACCCAAAACCTGGGAAACAAAAAGAGTTTAAACCAGACTTACAGTTCTGCATGGCT  
AAGAAGGCCTCAGAATCATGGTGGGAGGCGAAAGGCATTCTTATATGGTGGCAGCAAGAGAAAAATGAGGAAGAAGCAAAAGCAGAAACCTCTGC  
TAAACCCATCAGATCTCATGAGACTTATTTCACTATCAAGAGAACAGCATGGGAAAGACCAGTCCCATGAATTAATTACCTCTCCCTGGGTCCCT  
CCCTCAACATGTGGGAATTCTGGGAGAAACAATTCAAGATATGACACATTCATAATTTAAACAAAAAGCCTACAAAAGAACTTATAAGTTGAAAGAAG  
ATAATCTCTTACAAGGTGATGGAGGCTTTTTATTTTGCACAAAACCACTGCCGACGTTGCCGTGGCCACCTTGAGATGACACTGGAGGCCTG  
GAACATGGAGACTGTTTTCTGCAGAAACACATCCCTTGGAGTAATGAGCTACACCTACCTCAATTATTCAGTGCAGTACAACACTCCAGACAGG  
GCCTCTGTCTGTACCCAGGCTGGAGTGTATTGGCATGATTACAGTCACTGCCGCTTGAACCTCCAGGCTAAAACTGAGCAGCTGGGACTACA  
GGTGCACCACCATGCATGGTACCAGAGATATAATAATGAGAAACAGACATGCTCCCTCCCTCATTGAGGTTACAGCTTAGTGTGGAGACAGACAG  
ATGCCTAATGCACCATAGTATGGAAGGTGCTATGGACACAGTGTAAATCCATAATCTACATAGGTGGAGAAGTTCAGCAAAGGAAGTGGGAGTT  
AGGAATTTGGGAATGAGGAGCACAGTGGGATTAACCTGGGGCCATTTCATATGAGAGTTTAAAGAACTCAGGTCACTGACTTAGATTGGCTTCTCACA  
CATGGCAGGAAACACTGCTGCTAGCACTTCCCGAGTTCTACATCCTACAACATCCACCACCTGGATCTTAAAGTATGTAAGATCAAATGTAATAG  
CATGTCAAACAATGTGTAACCTCAGTTATAACAACATTACTGTATCTCATTGGGGATACAAAGCTCTACACACTGAAGGTGGTGAAGGAATATAAA  
AATCTATATATCTCATGGTCCAGACTTGGAGTACAAGTAATAAGAAGAATAAACTTAATCCCTTAAATAGATTCACCATAAGTTAGCTCAGGGCA  
ATCCAATACAAGTATGGTCTGTGATCCAACAGTATCTTACAGACAGCATGTTGAACATTGTGGGATGCATAAGCTATTGAGGCCTTTGAAGCTTT  
CTACTACATGGAGGCTAGGTCAGAGTCAAGATTTATGTTTTGCAGCACACTGGTCAGCTGTTTTGCAAATCAGGTTAAATGATTTTTACATGAG  
GCTGAGAGCATGGGAGATACTAATGTGTGTTCCCTAATGAGCTACTGCATAAGTTAGGAAATCGAAACACAGAAAAGATGAAAAGTATTTGCCAA  
GCCTATAGATAAAAGCAGTGGCAGAAAACAGGACTGGAACCTATATCTCTACTAATTTTTTTTTATTATAAAAAATAATCTGTTTTCAAAATATTA  
GAAGTACAACATATTGGCATATGCTTTCTGGAATATTTTCCCTGTGTTGTCATCATTATCATCTCCATCATCATTATATCCATCATCATCAT  
CACCATCATCATCGTCATCATTATCATCCATAGCCAACACATAATGCTTACCTAGTGCCAGATGCTGTCTAGGCATTTTACATATATTACT  
GGTAACTCATGTAATCCTTATAACAACCTTATAAGGTGGTTGCTATTTCCCATGTTACATATGAAGAGACAGAAGCATAAAGAAGTTGTACAGC  
TGTAATTGGCTGGGATTTGAACTTAAGCAGTCTAACCTTAGAGTAACGATTTTAAACAACTACACTATATACATACAAATTTACAAAATAAACTG  
GGCTGAGACAATAAA

**Marmoset ANRIL**

CGCUACAUCGGUCACCGACCGCCCUACCAGGAACCGCCGCGCUCGGCGGGUUCUGGGGUCGUCGCGUCCCCGCUCCCUCAUUCUUUGU  
UUUUCUGCCUCCCUUGUCGAAAGUCUCCAUCUUCGAACUAGAUUUUAGAAGAGAAAAAGGAAGAAAGGAAAGCGAGGUCAUCUCGUUGC  
UGUAUCGCCAAUCAGGAGGUGAAUGUCAGUUUUGAAACAAAAGCCGCUCCGUCUUCUAGAUUUGGAAAAACUAGCGAAAUAUAAUGAAACC  
GCUGCAGCUUCUGACGCGACAUCUGGACACGGCGUGGCGCUGGAGCUGCGGGCCCGCCGGGACCGGACUAGGACUAAUUUCCAGGACAUU  
UCAAGGAUCCAAGAGAGAAUUAUGGUGUCAUGCUAUGAUGAUUCCUCACCUCUCCCAUCUGUUCUCUGACCUGGCCUGCAUGACUCUGUUUG  
UGGUAGUUAGGGUGUGGUUAGUACCACUGAGGCCACACCUAUUGCUUCAUUUAUAGCACUGACCUGUCAUCAAUAGUACUUGCUGUCUUGGAUG  
UGGAGAUAAUUUUCUGCCAGGAUUCUUAUAAAAUAAAAaUACUGGGCACUAGGAAUAAUUAUUCAGUCUUAAAUUGUCUUUCUUAUC  
ACUACACCAGAAGUCUCCAGCCUUAGGACCCGGACUGUGGCCUUUGUAGUGACUAGAAAAGACAGUUUAAAGCAUGAAUUAUUUCCUUGUG  
CUUAGUGUUUUAAUUUUGUACAGGUCCAUGGCCUGUUAGAAACCAGGCUGCACAGCAGAAGGUGAGCAGCAUUAUGAGAAACCACAGACAGUU  
UGAGAAGUUAAUUAUUUUCUGUCAAGACCAUAUCAUUGGUGAAGAUGGAAUUUGAGCUUAUGUACUUAACCAUUGGACUACCUGCAUGCCCU  
UCAAGGAACUGCUAAGCCUUCUUAUGAUGAGAAGAAAAAGCCUCAUUCUGAUUCAACAGCAGAGAUCAAAGAAAAGACUUCUGUUUGCUGGCCAU  
CAGAUUAUGUUAUCUGUGUUUAAAGAAUUGAAAAACACACAUCAAGGAACAUCUCUUGGAAAGAGAGGAUUAAGCAUUAUUGUAGGUUAGC  
UGGAAUCCUUUCCCAAGUCAGAACUACUUUCUAGAACAGAACUGGGGAGACCUAUUUUGGAAUGUAUCUAAUCUCCAAAAGgaaaAAACCAUCAGAGGU  
AACAGUAGAGAAAGGGUUUACCAUGUUGGUCAGGCUGGUCUUGAACUCCUCAC<sub>cu</sub>CAAGUGAUCUGCCUGCCUCAGCCUCCAAAAGUGCUGAGAU  
UACAGGCGUGAGCCACCUUGUGUGGCCUGCCUGACUUUAAAAUUCUCUCCAAUGAACACCUUCACUGAUUCCAAGUGUGAAGAAuAGACACUAG  
GGAAAAACAUGGACCUAACAAGGACAAAUGGAAUUGUUAGAAACAUUUUCCAGAAGAACACUACUCUGGGCAUUUGAAUCUUUGCUUCUUUCU  
AGGUUUGACAAUGAGGCUAUCAUUAAGCCAAAUGUAAACUGAAAAGGUUGAAUCAGUCAGGAUAAACCCUUAUUGUGCUGUGAUAAACAACAAC  
CUCAAAAUUCAUUGGCUUAAAAUACACAGAAUUAUCUUACUCAUGAUACAUAUUAUCAUUAUGAUCUGCAAGGGAUCUGCUCACUGAAGUCACUG  
AAGuGAACUCCAACUGAUGGAACUGCCACUUUUUGGUCACUAUGUGUAUUAAUCUGUUUUAUCUGCUCUAUUAAAGAUCUGAAACUGGGAACAAA

AGAGGUUUAUUAGACUACAGUCCACAUGGCUGAGGAGACCUCAGAAUCAAAUGGAAGGUAAAAGGCACUUCUACAUGGUGGGAGCAAGAGG  
AAAAUGAAGAAGAAGCAAAAGUGGAAAACCCUGAUAAAGCACAUACAGAUUCUGGAGACUUAUUUCACUAUCAUGAGAGUAGCAUGGGAAAGACUGG  
CUCCUAUGAUUCAUUACCUCGCCGGGUCCUCCCAAAUUAUUGGGAAUUCUGGGAGAUACAUAUCAAGGUUAUGACACAUUUUAAAUUAAAACA  
AAAGuCCUACAAAGAACUCAUAAGUUAAAAUAAGACAAUCUCUCAAAGGUCAUGGAGGCUUCUUAUUUUGCCACAAAACCACUGGUGAUGUUGC  
CUGUGGCCACCUUGGAGAUACUCUGGAGACCUGGCACAUGGAGACUGCUUUUCUGUAGAAACCAUACCCUUGGUGUAAUGGGCUACACCUAUCU  
CAAUUUUCAGUGUAGUACAAUACUCCUGACAGGGUCUCACUCUGUUGCUCAGGCUGGAAUGUAUUUGCAUGAUUAUAGCUCACUACAGCCUUGAA  
CUCCAGGCUCAAACCUAAGCAGCUGGAACUAAAGGUGUACCACCAUGCAUGGUGCCAGAGAUUUUAUUUAGAAAACAGACAUGCUCUCCUCCCU  
CAUUGAGGUUACAGUUUAGUGUGGAGACAGACAGAUGCCUAAUGCACUAUAAUUGGAAAGUGAUUUGGACACAGUGCUCCAAUUCAUUGAUCUUAUG  
UAGGUGGAGAACUUCAGUAAAAGGAAGCAGCAGUCAGGAAUUUGGGAAUGAGAAGCACAGUGAUUAAACUAGGGCCAUUCAUUGGGAGUUUAAAGAA  
CUCUGGUCAGUGACUUAGAUUGGCUUCUCCACAUGACAAGAAACAUUGCUGCCAGCACUUCCCAAGUUCUAUUAUCCUACAACGUCUACCACUGGA  
UCUatgttaAGUUCAAaAUGUAAUAGCAUGUCAAAACAUGUGCAACUC-AGUUUAUACAAACAUUGCCAUAUCUCACUGGGGAUACGAAGUUCUACA  
CACUUAAAAAAUGGUAGAGGCAUUAACAUAUCUAUUGUCUCACAGUUUAGACUUGGAGUAUAAGCAAUAAGAAUAAAUAUAGUCCCUAAGUAUUAU  
UCACGUAAGUUAGCUCAGGGCAAUUCCAAUGCAAGUAUGAUCUGUGAUCCAACAGUAUCUUACAAAUAGCAAGUUGAACAUUGGGUUUCAUUA  
CUAUUGAGGACUUUGAAGCUUUCUGCUACAUGGAGGCUAGGGCCAGUGUCUAGAUUUUAUCUUUGCAGCAUACUGGUCAGCUGUUUUUGCAAUCA  
GGUUAUUUUUUUUUUUUUUUAGAGGCUGAGAGCAUGGGAGAUUUAAUGUAAGUUUCUAAAUGAGCUACUGCAUUAUUUGAAACAAAAAAGAUCAAAA  
GUGAUUUGACCAAGCAUAUAGAUCAAAGCUGUGGCAAAACCAGGAAUGGAACAUAUAUAUCUCUACUCAUGGUUUAAAACAAAAAUAUUAAACCUUGU  
UUCAAAAUAUUAAAAAGUCAUAAGAAAGGUAAACAUGUGGAUAAACAAAAUAAAAAAAAAGUUUUAUCCAGUAAUAACAUAUUGGUUAUCAUCUUUC  
U
